# Supplementary material
Source: publisher figshare collection journal article supplement (https://acs.figshare.com/ndownloader/files/5837187)

# Supporting Information

## Design and Synthesis of Activity Probe for Glycosidases

Chang-Sheng Tsai,<sup>a</sup> Yaw-Kuen Li,<sup>b</sup> and Lee-Chiang Lo<sup>a,\*</sup>

<sup>a</sup>Department of Chemistry, National Taiwan University  
Taipei 106, TAIWAN

<sup>b</sup>Department of Applied Chemistry, The National Chiao Tung University  
Hsinchu 300, TAIWAN

lclo@ccms.ntu.edu.tw

Experimental procedures and characterization, including copies of <sup>1</sup>H and <sup>13</sup>C NMR, for compounds **1**, **4–9**, and **11** as well as conditions for the labeling of β-glucosidase with probe **1** are included.

Scheme 1<sup>a</sup>

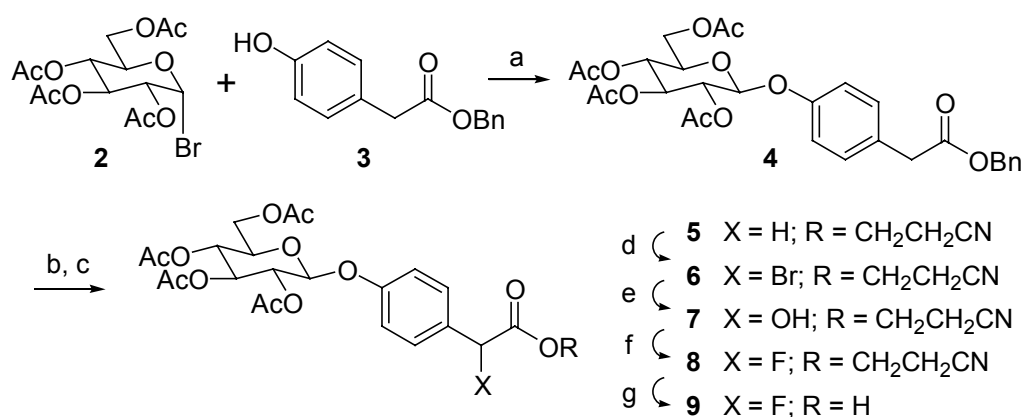

<sup>a</sup>(a) AgOTf, CH<sub>2</sub>Cl<sub>2</sub> (67%); (b) H<sub>2</sub>, Pd/C (91%); (c) DCC, DMAP, HOCH<sub>2</sub>CH<sub>2</sub>CN, CH<sub>2</sub>Cl<sub>2</sub> (95%); (d) NBS, CCl<sub>4</sub>, hv (92%); (e) AgNO<sub>3</sub>, acetone/H<sub>2</sub>O (55%); (f) DAST, CH<sub>2</sub>Cl<sub>2</sub> (85%); (g) DBU, CH<sub>2</sub>Cl<sub>2</sub> (95%).

Scheme 2<sup>a</sup>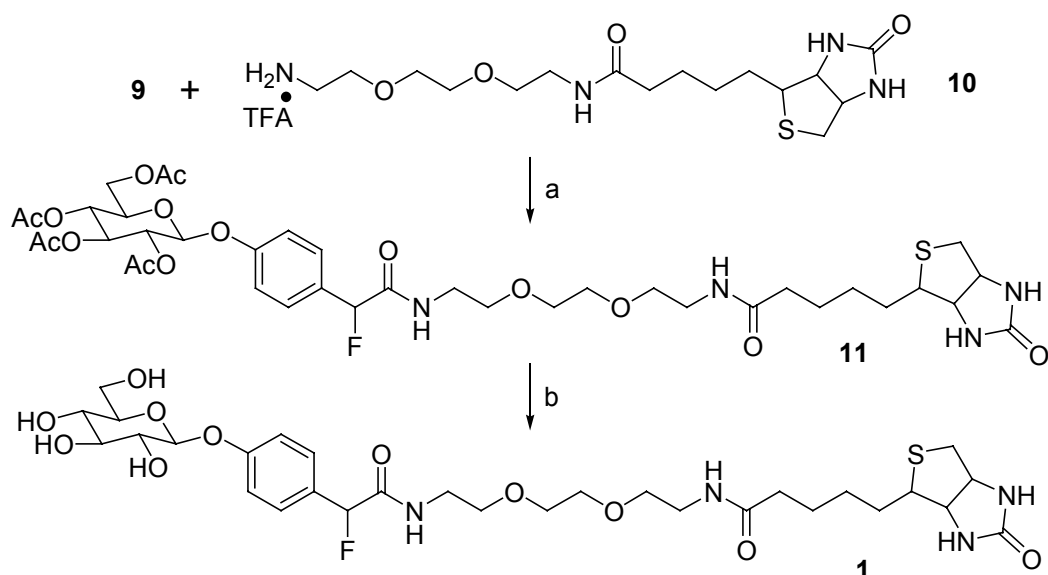

<sup>a</sup>(a) DCC, HOBT, TEA (83%); (b) Na<sub>2</sub>CO<sub>3</sub>, MeOH (92%).

### Experimental:

**General methods.** All reagents and starting materials were obtained from commercial suppliers (Acros, Aldrich and Merck) and were used without further purification. IR spectra were recorded on a Nicolet 550 series II spectrometer. <sup>1</sup>H and <sup>13</sup>C NMR were recorded using a Bruker AC-300 or Bruker Avance 400 spectrometer. The proton and carbon chemical shifts are given in ppm using CDCl<sub>3</sub> (δ<sub>H</sub> 7.24 and 77.0) as internal standard. High resolution mass spectra were recorded with a JEOL-102A mass spectrometer. Analytical TLC (silica gel, 60F-54, Merck) and spots were visualized under UV light and/or phosphomolybdic acid-ethanol. Column chromatography was performed with Kieselgel 60 (70-230 mesh) silica gel (Merck). Melting points are reported without correction.

### [4-(Tetra-*O*-acetyl-β-D-glucopyranosyloxy)-phenyl]-acetic acid benzyl ester (**4**):

Benzyl *p*-hydroxyphenylacetate **3** (265 mg, 1.1 mmol) and AgOTf (421 mg, 1.6 mmol) in the presence of 3A molecular sieves was dissolved/suspended in 10 mL of CH<sub>2</sub>Cl<sub>2</sub>. The mixture was cooled in an ice bath and a solution of tetra-*O*-acetyl-glucopyranosyl bromide **2** (675 mg, 1.6 mmol) in 5 mL of CH<sub>2</sub>Cl<sub>2</sub> was slowly added. The reaction mixture was kept in the dark for 2 h. It was quenched by adding 1 mL of DIEA. The yellow precipitate was filtered off. The filtrate was concentrated to dryness and the residue was subjected to silica gel column chromatography eluted with *n*-hexane/EtOAc (7/3). The β-glucoside **4** (420 mg) was obtained in 67% yield. *R*<sub>f</sub> = 0.45 (*n*-hexane/EtOAc = 1/1), mp 75–78°C. <sup>1</sup>H NMR (CDCl<sub>3</sub>, 400 MHz) δ 7.34–7.25 (m, 5 H), 7.17 (d, *J* = 6.6 Hz, 2 H), 6.92 (d, *J* = 6.6 Hz, 2H), 5.29–5.21 (m, 2

H, H-2 + H-4), 5.11 (dd,  $J = 11.7, 9.9$  Hz, 1H, H-3), 5.08 (s, 2H), 5.03 (d,  $J = 7.6$  Hz, 1 H, H-1), 4.26 (dd,  $J = 12.6, 5.3$  Hz, 1 H, H-6), 4.13 (dd,  $J = 12.6, 2.4$  Hz, 1 H, H-6'), 3.83 (m, 1 H, H-5), 3.59 (s, 2 H), 1.99 (s, 3 H), 1.98 (s, 3 H), 1.97 (s, 3 H), 1.96 (s, 3 H).  $^{13}\text{C}$  NMR ( $\text{CDCl}_3$ , 100 MHz)  $\delta$  171.3 (C), 170.4 (C), 170.1 (C), 169.3 (C), 169.2 (C), 155.9 (C), 135.7 (C), 130.4 (CH), 128.8 (CH), 128.6 (CH), 128.5 (CH), 128.1 (C), 117.0 (CH), 99.1 (CH), 72.6 (CH), 71.9 (CH), 71.1 (CH), 68.2 (CH), 66.6 (CH<sub>2</sub>), 61.8 (CH<sub>2</sub>), 40.3 (CH<sub>2</sub>), 20.6 (CH<sub>3</sub>), 20.5 (CH<sub>3</sub>), 20.5 (CH<sub>3</sub>), 20.5 (CH<sub>3</sub>). IR (KBr): 3038, 2964, 2945, 1760, 1512, 1450, 1369, 1239, 1140, 1047, 978, 922  $\text{cm}^{-1}$ . HRMS calcd for  $\text{C}_{29}\text{H}_{33}\text{O}_{12}$  ( $M + 1$ )<sup>+</sup> 573.1972, found 573.1969.

**[4-(Tetra-*O*-acetyl- $\beta$ -D-glucopyranosyloxy)-phenyl]-acetic acid 2-cyanoethyl ester (5):** To a solution of compound **4** (85 mg, 0.15 mmol) in 5 mL of EtOAc and a few drops of MeOH was added a spatula of 10% Pd/C. The system was evacuated and filled with H<sub>2</sub> three times. It was kept under H<sub>2</sub> atmosphere with a balloon and stirred at rt for 1 h. The Pd/C catalyst was filtered off through Celite 535, and the filtrate concentrated. The acid intermediate (65 mg, 91%) was obtained as a white foam after silica gel column chromatography eluted with MeOH/ $\text{CHCl}_3$  (5/95).  $R_f = 0.51$  (MeOH/ $\text{CHCl}_3 = 1/9$ ).  $^1\text{H}$  NMR ( $\text{CDCl}_3$ , 400 MHz)  $\delta$  7.17 (d,  $J = 6.7$  Hz, 2 H), 6.92 (d,  $J = 6.7$  Hz, 2H), 5.29-5.20 (m, 2 H, H-2 + H-4), 5.13 (dd,  $J = 9.7, 9.3$  Hz, 1 H, H-3), 5.03 (d,  $J = 7.5$  Hz, 1 H, H-1), 4.25 (dd,  $J = 12.3, 5.3$  Hz, 1 H, H-6), 4.13 (dd,  $J = 12.3, 2.4$  Hz, 1 H, H-6'), 3.82 (m, 1 H), 3.56 (s, 2 H), 2.03 (s, 3 H), 2.01 (s, 3 H), 1.99 (s, 3 H), 1.98 (s, 3 H).  $^{13}\text{C}$  NMR ( $\text{CDCl}_3$ , 100 MHz)  $\delta$  177.1 (C), 170.6 (C), 170.2 (C), 169.4 (C), 169.3 (C), 156.0 (C), 130.5 (CH), 128.2 (C), 117.0 (CH), 99.0 (CH), 72.6 (CH), 71.9 (CH), 71.1 (CH), 68.2 (CH), 61.9 (CH<sub>2</sub>), 40.0 (CH<sub>2</sub>), 20.6 (CH<sub>3</sub>), 20.5 (CH<sub>3</sub>), 20.5 (CH<sub>3</sub>), 20.5 (CH<sub>3</sub>); IR (neat): 3389, 1760, 1523, 1372, 1227, 1037  $\text{cm}^{-1}$ . HRMS calcd for  $\text{C}_{22}\text{H}_{27}\text{O}_{12}$  ( $M + 1$ )<sup>+</sup> 483.1503; found 483.1499. To a solution of the acid intermediate (575 mg, 1.19 mmol), 3-hydroxypropionitrile (98  $\mu\text{L}$ , 1.43 mmol) and DMAP (15 mg, 0.11 mmol) in 50 mL of  $\text{CH}_2\text{Cl}_2$  cooled in an ice bath was slowly injected 4 mL of DCC solution (0.45 M in  $\text{CH}_2\text{Cl}_2$ ). The reaction mixture was allowed to warm to rt and stirred for 10 h. The white precipitate was filtered off and the filtrate concentrated. The oil residue was dissolved in 60 mL of EtOAc and washed with 5% citric acid ( $\times 3$ ), 10%  $\text{NaHCO}_3$  ( $\times 3$ ) and brine. The organic phase was dried over anhydrous  $\text{Na}_2\text{SO}_4$ , filtered and concentrated. The resulting oil was chromatographed on silica gel (EtOAc/  $\text{CHCl}_3 = 2/8$ ) to give compound **5** as an oil (606 mg, 95%).  $R_f = 0.33$  (EtOAc/  $\text{CHCl}_3 = 3/7$ ).  $^1\text{H}$  NMR ( $\text{CDCl}_3$ , 400 MHz)  $\delta$  7.18 (dd,  $J = 6.6, 2.1$  Hz, 2 H), 6.92 (dd,  $J = 6.6, 2.1$  Hz, 2 H), 5.28-5.19 (m, 2 H, H-2 + H-4), 5.12 (dd,  $J = 9.9, 9.3$  Hz, 1H, H-3), 5.03 (d,  $J = 7.6$  Hz, 1 H, H-1), 4.26-4.22 (m, 3 H), 4.12 (dd,  $J = 12.3, 2.5$  Hz, 1 H, H-6), 3.80 (m, 1 H,

H-5), 3.59 (s, 2 H), 2.66 (t,  $J = 6.3$  Hz, 2 H), 2.03 (s, 3 H), 2.01 (s, 3H), 2.00 (s, 3 H), 1.99 (s, 3 H).  $^{13}\text{C}$  NMR ( $\text{CDCl}_3$ , 100 MHz)  $\delta$  170.9 (C), 170.5 (C), 170.1 (C), 169.3 (C), 169.2 (C), 156.1 (C), 130.4 (CH), 128.1 (C), 117.1 (CH), 116.6 (C), 99.0 (CH), 72.6 (CH), 71.9 (CH), 71.1 (CH), 68.2 (CH), 61.8 ( $\text{CH}_2$ ), 59.0 ( $\text{CH}_2$ ), 39.9 ( $\text{CH}_2$ ), 20.6 ( $\text{CH}_3$ ), 20.5 ( $\text{CH}_3$ ), 20.5 ( $\text{CH}_3$ ), 20.5 ( $\text{CH}_3$ ), 17.9 ( $\text{CH}_2$ ). IR (neat): 3336, 2936, 2850, 2259, 1747, 1517, 1424, 1228, 1155, 1037  $\text{cm}^{-1}$ . HRMS calcd for  $\text{C}_{25}\text{H}_{30}\text{NO}_{12}$  ( $M + 1$ )<sup>+</sup> 536.1768; found 536.1772.

**[4-(Tetra-*O*-acetyl- $\beta$ -D-glucopyranosyloxy)-phenyl]-bromoacetic acid 2-cyanoethyl ester (6):** To a solution of compound **5** (100 mg, 0.19 mmol) in 15 mL of  $\text{CCl}_4$  was added NBS (36.6 mg, 0.21 mmol) and a catalytic amount of AIBN. The reaction flask was equipped with a condenser, and purged and filled with  $\text{N}_2$  three times. It was irradiated with a 100W tungsten lamp for 1 h until white precipitate formed. The precipitate was filtered off and the filtrate concentrated. It was subjected to silica gel column chromatography eluted with EtOAc/ $\text{CHCl}_3$  (2/8) to give the ester product **6** (105 mg, 92%) as a white foam.  $R_f = 0.33$  (EtOAc/  $\text{CHCl}_3 = 3/7$ ).  $^1\text{H}$  NMR ( $\text{CDCl}_3$ , 400 MHz)  $\delta$  7.47 (d,  $J = 8.6$  Hz, 2 H), 6.95 (d,  $J = 8.6$  Hz, 2 H), 5.33 (s, 1 H), 5.27-5.23 (m, 2 H, H-2 + H-4), 5.18-5.07 (m, 2 H, H-1 + H-3), 4.35-4.31 (m, 2 H), 4.24 (dd,  $J = 11.8, 5.3$  Hz, 1 H, H-6), 4.15 (dd,  $J = 11.8, 0.8$  Hz, 1H, H-6'), 3.84 (m, 1 H, H-5), 2.70 (t,  $J = 6.3$  Hz, 2 H), 2.04 (s, 3H), 2.01 (s, 3 H), 2.00 (s, 3 H), 2.00 (s, 3 H).  $^{13}\text{C}$  NMR ( $\text{CDCl}_3$ , 100 MHz)  $\delta$  170.5 (C), 170.1 (C), 169.3 (C), 169.2 (C), 167.7 (C), 157.4 (C), 130.2 (CH), 129.7 (C), 117.1 (CH), 116.2 (C), 98.5 (CH), 72.5 (CH), 72.1 (CH), 71.0 (CH), 68.1 (CH), 61.8 ( $\text{CH}_2$ ), 60.3 ( $\text{CH}_2$ ), 45.0 (CH), 20.6 ( $\text{CH}_3$ ), 20.5 ( $\text{CH}_3$ ), 20.5 ( $\text{CH}_3$ ), 20.5 ( $\text{CH}_3$ ), 17.7 ( $\text{CH}_2$ ). IR (neat): 2982, 1753, 1510, 1385, 1221, 1037  $\text{cm}^{-1}$ . HRMS calcd for  $\text{C}_{25}\text{H}_{29}^{79}\text{BrNO}_{12}$  ( $M + 1$ ) 614.0873; found 614.0872.

**[4-(Tetra-*O*-acetyl- $\beta$ -D-glucopyranosyloxy)-phenyl]-hydroxyacetic acid 2-cyanoethyl ester (7):** Compound **6** (150.0 mg, 0.24 mmol) was dissolved in 5 mL of acetone. A solution of  $\text{AgNO}_3$  (83.0 mg, 0.48 mmol) and  $\text{Ag}_2\text{CO}_3$  (33.1 mg, 0.12 mmol) in 5 mL of  $\text{H}_2\text{O}$  was added. A dark greenish precipitate was formed immediately. The reaction mixture was stirred at rt for 30 min. It was filtered and the filtrate was concentrated to dryness. The residual oil was dissolved in 50 mL of EtOAc and washed with 5% citric acid ( $\times 3$ ), 10%  $\text{NaHCO}_3$  ( $\times 3$ ) and brine. The organic phase was dried over anhydrous  $\text{Na}_2\text{SO}_4$ , filtered and concentrated. The resulting oil was chromatographed on silica gel (EtOAc/  $\text{CHCl}_3 = 4/6$ ) to give compound **7** as a white foam (74.0 mg, 55%).  $R_f = 0.40$  (EtOAc/  $\text{CHCl}_3 = 6/4$ ).  $^1\text{H}$  NMR ( $\text{CDCl}_3$ , 400 MHz)  $\delta$  7.30 (d,  $J = 8.4$  Hz, 2 H), 6.91 (d,  $J = 8.4$  Hz, 2 H),

5.22-5.02 (m, 5 H), 4.28 (m, 1 H), 4.19-4.15 (m, 2 H), 4.07 (dd,  $J = 12.2, 1.7$  Hz, 1 H, H-6), 3.83 (m, 1 H, H-5), 3.74 (d,  $J = 3.3$  Hz, 1 H, OH), 2.61-2.54 (m, 2 H), 1.98 (s, 3 H), 1.96 (s, 3 H), 1.96 (s, 3 H), 1.94 (s, 3 H).  $^{13}\text{C}$  NMR ( $\text{CDCl}_3$ , 100 MHz)  $\delta$  172.6 (C), 170.4 (C), 170.0 (C), 169.3 (C), 169.2 (C), 156.8 (C), 132.5 (C), 127.8 (CH), 116.8 (CH), 116.3 (C), 98.6 (CH), 72.4 (CH), 72.1 (CH), 71.7 (CH), 70.8 (CH), 68.0 (CH), 61.7 ( $\text{CH}_2$ ), 59.7 ( $\text{CH}_2$ ), 20.5 ( $\text{CH}_3$ ), 20.4 ( $\text{CH}_3$ ), 20.4 ( $\text{CH}_3$ ), 20.4 ( $\text{CH}_3$ ), 17.6 ( $\text{CH}_2$ ). IR (neat): 3481, 2969, 2259, 1746, 1517, 1372, 1227, 1182, 1044  $\text{cm}^{-1}$ . HRMS calcd for  $\text{C}_{25}\text{H}_{30}\text{NO}_{13}$  ( $M + 1$ ) 552.1718; found 552.1729.

**[4-(Tetra-*O*-acetyl- $\beta$ -D-glucopyranosyloxy)-phenyl]-fluoroacetic acid 2-cyanoethyl ester (8):** To an ice-cooled solution of compound **7** (130.0 mg, 0.23 mmol) in 10 mL of  $\text{CH}_2\text{Cl}_2$  was added 70  $\mu\text{L}$  (0.46 mmol) of DAST. The reaction mixture was allowed to warm to rt and stirred for 15 h. It was quenched by adding small amount of silica gel and 1.5 mL of MeOH. It was concentrated and the fluorinated product **8** (110.0 mg, 85%) was obtained as a white foam after silica gel column chromatography eluted with EtOAc/ $\text{CHCl}_3$  (2/8).  $R_f = 0.33$  (EtOAc/ $\text{CHCl}_3 = 3/7$ ).  $^1\text{H}$  NMR ( $\text{CDCl}_3$ , 400 MHz)  $\delta$  7.35 (d,  $J = 8.5$  Hz, 2 H), 6.97 (d,  $J = 8.5$  Hz, 2 H), 5.74 (d,  $J = 47.2$  Hz, 1 H, CHF), 5.27-5.18 (m, 2 H), 5.12-5.06 (m, 2 H), 4.34 (m, 1 H), 4.31-4.17 (m, 2 H), 4.10 (d,  $J = 12.3$  Hz, 1 H, H-6), 3.84 (m, 1 H, H-5), 2.71-2.61 (m, 2 H), 2.00 (s, 3 H), 1.99 (s, 3 H), 1.98 (s, 3 H), 1.97 (s, 3 H).  $^{13}\text{C}$  NMR ( $\text{CDCl}_3$ , 100 MHz)  $\delta$  170.3 (C), 170 (C), 169.2 (C), 169.1 (C), 167.8 (d,  $J = 28.8$  Hz, C), 157.7 (C), 128.3 (d,  $J = 20.5$  Hz, C), 128.2 (CH), 117.1 (CH), 116.1 (C), 98.5 (CH), 88.4 (d,  $J = 185.0$  Hz, CHF), 72.4 (CH), 72.0 (CH), 70.9 (CH), 68.0 (CH), 61.7 ( $\text{CH}_2$ ), 59.6 ( $\text{CH}_2$ ), 20.5 ( $\text{CH}_3$ ), 20.4 ( $\text{CH}_3$ ), 20.4 ( $\text{CH}_3$ ), 20.4 ( $\text{CH}_3$ ), 17.7 ( $\text{CH}_2$ ).  $^{19}\text{F}$  NMR ( $\text{CDCl}_3$ )  $\delta$  -179.0 (d,  $J = 49.6$  Hz), -179.3 (d,  $J = 50.0$  Hz). IR (neat): 2250, 1753, 1523, 1379, 1247, 1037  $\text{cm}^{-1}$ . HRMS calcd for  $\text{C}_{25}\text{H}_{29}\text{O}_{12}\text{NF}$  ( $M + 1$ ) 554.1674; found 554.1678.

**Triethylammonium [4-(Tetra-*O*-acetyl- $\beta$ -D-glucopyranosyloxy)-phenyl]-fluoroacetate (9):** To a solution of the fluoride **8** (130.0 mg, 0.23 mmol) in 5 mL of  $\text{CH}_2\text{Cl}_2$  was added 50  $\mu\text{L}$  (0.46 mmol) of DBU. The reaction mixture was stirred at rt for 30 min. EtOAc (50 mL) was then added, and it was washed with 5% citric acid ( $\times 3$ ),  $\text{H}_2\text{O}$  ( $\times 1$ ) and brine ( $\times 1$ ). The organic phase was dried over anhydrous  $\text{Na}_2\text{SO}_4$  and filtered. Since the  $\alpha$ -fluoroacid was not stable, it was stored as the triethylammonium salt. This was achieved by adding 1 mL of TEA to the filtrate. The triethylammonium salt **9** was obtained as a solid (103.0 mg, 95%) after concentration.  $R_f = 0.25$  (MeOH/ $\text{CHCl}_3 = 3/7$ ), mp 111–113°C.  $^1\text{H}$  NMR ( $\text{CDCl}_3$ , 400 MHz)  $\delta$  7.38 (d,  $J = 8.5$  Hz, 2 H), 6.84 (d,  $J = 8.5$  Hz, 2 H), 5.53 (d,  $J = 50.4$  Hz,

1 H, CHF), 5.23-5.14, (m, 2 H), 5.06 (dd,  $J = 11.2, 9.5$  Hz, 1 H, H-3), 4.98 (d,  $J = 7.7$  Hz, 1 H, H-1), 4.97 (d,  $J = 7.7$  Hz, 1 H, H-1'), 4.19 (dd,  $J = 12.3, 5.5$  Hz, 1 H, H-6), 4.06 (dd,  $J = 12.3, 2.4$  Hz, 1 H, H-6'), 3.78 (m, 1 H, H-5), 2.97 (q,  $J = 7.5$  Hz, 6 H), 1.98 (s, 3 H), 1.96 (s, 3 H), 1.96 (s, 3 H), 1.94 (s, 3 H), 1.16 (t,  $J = 7.5$  Hz, 9 H).  $^{13}\text{C}$  NMR ( $\text{CDCl}_3$ , 100 MHz)  $\delta$  174.2 (d,  $J = 22.0$  Hz, C), 170.4 (C), 170.0 (C), 169.2 (C), 169.1 (C), 156.6 (C), 133.1 (d,  $J = 20.5$  Hz, C), 128.0 (CH), 116.6 (CH), 99.0 (CH), 90.8 (d,  $J = 183.6$  Hz, CHF), 72.5 (CH), 71.8 (CH), 71.0 (CH), 68.1 (CH), 61.8 ( $\text{CH}_2$ ), 44.8 ( $\text{CH}_2$ ), 20.5 ( $\text{CH}_3$ ), 20.4 ( $\text{CH}_3$ ), 20.4 ( $\text{CH}_3$ ), 20.4 ( $\text{CH}_3$ ), 8.2 ( $\text{CH}_3$ ).  $^{19}\text{F}$  NMR ( $\text{CDCl}_3$ )  $\delta$  -170.2 (d,  $J = 53.6$  Hz), -170.6 (d,  $J = 53.6$  Hz). IR (neat): 3402, 1747, 1615, 1517, 1379, 1234, 1063, 1031  $\text{cm}^{-1}$ . HRMS calcd for  $\text{C}_{28}\text{H}_{41}\text{FNO}_{12}$  ( $\text{M} + \text{TEA} + 1$ ) 602.2613; found 602.2624.

***N*-[4-(Tetra-*O*-acetyl- $\beta$ -D-glucopyranosyloxy)-phenyl]-fluoroacetyl-*N'*-biotinyl-3,6-dioxaoctane-1,8-diamine (**11**):** To a solution of the triethylammonium salt of  $\alpha$ -fluoroacid **9** (65.0 mg, 0.11 mmol) and compound **10** (61.0 mg, 0.13 mmol) in 3 mL of DMF was added HOBt (22.0 mg, 0.16 mmol), TEA (250  $\mu\text{L}$ ) and EDCI (31.1 mg, 0.16 mmol). The reaction mixture was stirred at rt for 24 h. DMF was then removed under high vacuum. The residual oil was dissolved in 40 mL of EtOAc. It was washed with 5% citric acid ( $\times 3$ ), 10%  $\text{NaHCO}_3$  ( $\times 3$ ) and brine. The organic phase was dried over anhydrous  $\text{Na}_2\text{SO}_4$ , filtered and concentrated. The biotinylated product **11** (77.0 mg, 83%) was obtained as an oil after silica gel column chromatography eluted with MeOH/ $\text{CHCl}_3$  (5/95).  $R_f = 0.33$  (MeOH/ $\text{CHCl}_3 = 1/9$ ).  $^1\text{H}$  NMR ( $\text{CDCl}_3$ , 400 MHz)  $\delta$  7.34 (d,  $J = 8.3$  Hz, 2 H), 7.26 (bs, 1H, NH), 6.95 (d,  $J = 8.3$  Hz, 2 H), 6.72 (bs, 1 H, NH), 6.61 (bs, 1 H, NH), 5.87 (bs, 1 H, NH), 5.75 (d,  $J = 48.2$  Hz, 1 H, CHF), 5.35-5.22 (m, 2 H), 5.20-5.12 (m, 2 H), 4.46 (bs, 1 H), 4.28-4.15 (m, 2 H), 4.09 (d,  $J = 11.9$  Hz, 1 H, H-6), 3.92 (m, 1 H, H-5), 3.62-3.30 (m, 12 H), 3.05 (br, 1 H), 2.80 (dd,  $J = 12.6, 5.0$  Hz, 1 H), 2.55 (d,  $J = 12.5$  Hz, 1 H), 2.13 (dd,  $J = 7.4, 4.9$  Hz, 2 H), 3.01 (s, 3 H), 1.98 (s, 3 H), 1.98 (s, 3 H), 1.97 (s, 3H), 1.68-1.48 (m, 4 H), 1.38-1.28 (m, 2 H).  $^{13}\text{C}$  NMR ( $\text{CDCl}_3$ , 100 MHz)  $\delta$  173.3 (C), 170.5 (C), 170.1 (C), 169.3 (C), 169.2 (C), 168.6 (d,  $J = 22.1$  Hz, C), 164.2 (C), 157.5 (C), 129.8 (d,  $J = 19.0$  Hz, C), 128.4 (CH), 116.8 (CH), 98.6 (CH), 91.2 (d,  $J = 185.8$  Hz, CHF), 72.5 (CH), 71.9 (CH), 70.9 (CH), 70.0 ( $\text{CH}_2$ ), 69.9 ( $\text{CH}_2$ ), 69.8 ( $\text{CH}_2$ ), 69.3 ( $\text{CH}_2$ ), 68.0 (CH), 61.7 ( $\text{CH}_2$ ), 61.6 (CH), 60.1 (CH), 55.6 (CH), 40.3 ( $\text{CH}_2$ ), 38.9 ( $\text{CH}_2$ ), 38.8 ( $\text{CH}_2$ ), 35.8 ( $\text{CH}_2$ ), 28.2 ( $\text{CH}_2$ ), 27.9 ( $\text{CH}_2$ ), 25.5 ( $\text{CH}_2$ ), 20.6 ( $\text{CH}_3$ ), 20.5 ( $\text{CH}_3$ ), 20.5 ( $\text{CH}_3$ ), 20.5 ( $\text{CH}_3$ ).  $^{19}\text{F}$  NMR ( $\text{CDCl}_3$ )  $\delta$  -175.4 (d,  $J = 51.2$  Hz), -175.8 (d,  $J = 51.2$  Hz). IR (neat): 3350, 2929, 1753, 1694, 1661, 1569, 1550, 1517, 1379, 1228, 1050.  $\text{cm}^{-1}$ . HRMS calcd for  $\text{C}_{38}\text{H}_{54}\text{FN}_4\text{O}_{15}\text{S}$  ( $\text{M} + 1$ ) 857.3291; found 857.3297.

***N*-Biotinyl-*N'*-[4-( $\beta$ -D-glucopyranosyloxy)-phenyl]-fluoroacetyl-3,6-dioxaoctane-1,8-diamine (**1**):** To a solution of biotinylated compound **11** (72.0 mg, 0.084 mmol) in 5 mL of MeOH was added 35.6 mg of Na<sub>2</sub>CO<sub>3</sub>. The mixture was stirred at rt for 1 h. It was filtered through Celite and filtrate concentrated. The target product **1** was obtained as a white foam (53.0 mg, 92%) after silica gel column chromatography eluted with MeOH/CHCl<sub>3</sub> (3/7). *R<sub>f</sub>* = 0.33 (MeOH/CHCl<sub>3</sub> = 3/7). <sup>1</sup>H NMR (D<sub>2</sub>O, 400 MHz)  $\delta$  7.47 (d, *J* = 8.4 Hz, 2 H), 7.19 (d, *J* = 8.4 Hz, 2 H), 5.88 (d, *J* = 47.3 Hz, 1 H, *CHF*), 5.13 (d, *J* = 7.0 Hz, 1 H, H-1), 4.51 (dd, *J* = 7.4, 4.9 Hz, 1 H), 4.29 (dd, *J* = 4.4, 7.8 Hz, 1 H), 3.92 (d, *J* = 11.3 Hz, 1 H), 3.67 (dd, *J* = 12.4, 5.5 Hz, 1H), 3.70-3.43 (m, 14 H), 3.35 (t, *J* = 4.8 Hz, 2 H), 3.21 (m, 1 H), 2.91 (dd, *J* = 13.0, 4.9 Hz, 1 H), 2.71 (d, *J* = 13.0 Hz, 1 H), 2.20 (t, *J* = 7.3 Hz, 2 H), 1.70-1.45 (m, 4 H), 1.38-1.27 (m, 2 H). <sup>13</sup>C NMR (D<sub>2</sub>O, 100 MHz)  $\delta$  176.7 (C), 171.3 (d, *J* = 24.0 Hz, C), 165.3 (C), 158.2 (C), 129.6 (CH), 129.3 (C), 117.1 (CH), 100.3 (CH), 91.2 (d, *J* = 183.0 Hz, *CHF*), 76.5 (CH), 75.9 (CH), 73.2 (CH), 69.8 (CH<sub>2</sub>), 69.8 (CH<sub>2</sub>), 69.8 (CH), 69.2 (CH<sub>2</sub>), 69.0 (CH<sub>2</sub>), 62.3 (CH), 60.9 (CH<sub>2</sub>), 60.4 (CH), 55.7 (CH), 40.0 (CH<sub>2</sub>), 39.2 (CH<sub>2</sub>), 39.0 (CH<sub>2</sub>), 35.7 (CH<sub>2</sub>), 28.3 (CH<sub>2</sub>), 28.0 (CH<sub>2</sub>), 25.5 (CH<sub>2</sub>). <sup>19</sup>F NMR (D<sub>2</sub>O)  $\delta$  -169.7 (d, *J* = 49.2 Hz), -169.8 (d, *J* = 50.4 Hz). IR (KBr): 3380, 2939, 2883, 1698, 1549, 1512, 1462, 1239, 1083, 1059 cm<sup>-1</sup>. HRMS calcd for C<sub>30</sub>H<sub>46</sub>FN<sub>4</sub>O<sub>11</sub>S (M + 1) 689.2868; found 689.2885.

**Labeling of  $\beta$ -glucosidase with probe **1**:** Purified  $\beta$ -glucosidase (2.0  $\mu$ g) was incubated with 1 mM of probe **1** in 50 mM of phosphate buffer (pH 7.0) at 37°C for 30 min. The reaction products were separated by 8% SDS-polyacrylamide gel electrophoresis and transferred onto a nitrocellulose membrane. The membrane was blocked with 10% nonfat dry milk, washed with TTBS (0.05% Tween-20, 20 mM Tris pH 7.6, 137 mM NaCl), and treated with a streptavidin-horseradish peroxidase conjugate (Amersham-Pharmacia, 1:2000 dilution) in TTBS containing 1% nonfat dry milk for 1 h at 25°C. Visualization of bound streptavidin-horseradish peroxidase conjugate was achieved by treating the membrane with ECL chemiluminescence reagents (Amersham-Pharmacia) and exposed to film for 1-30 min before development.

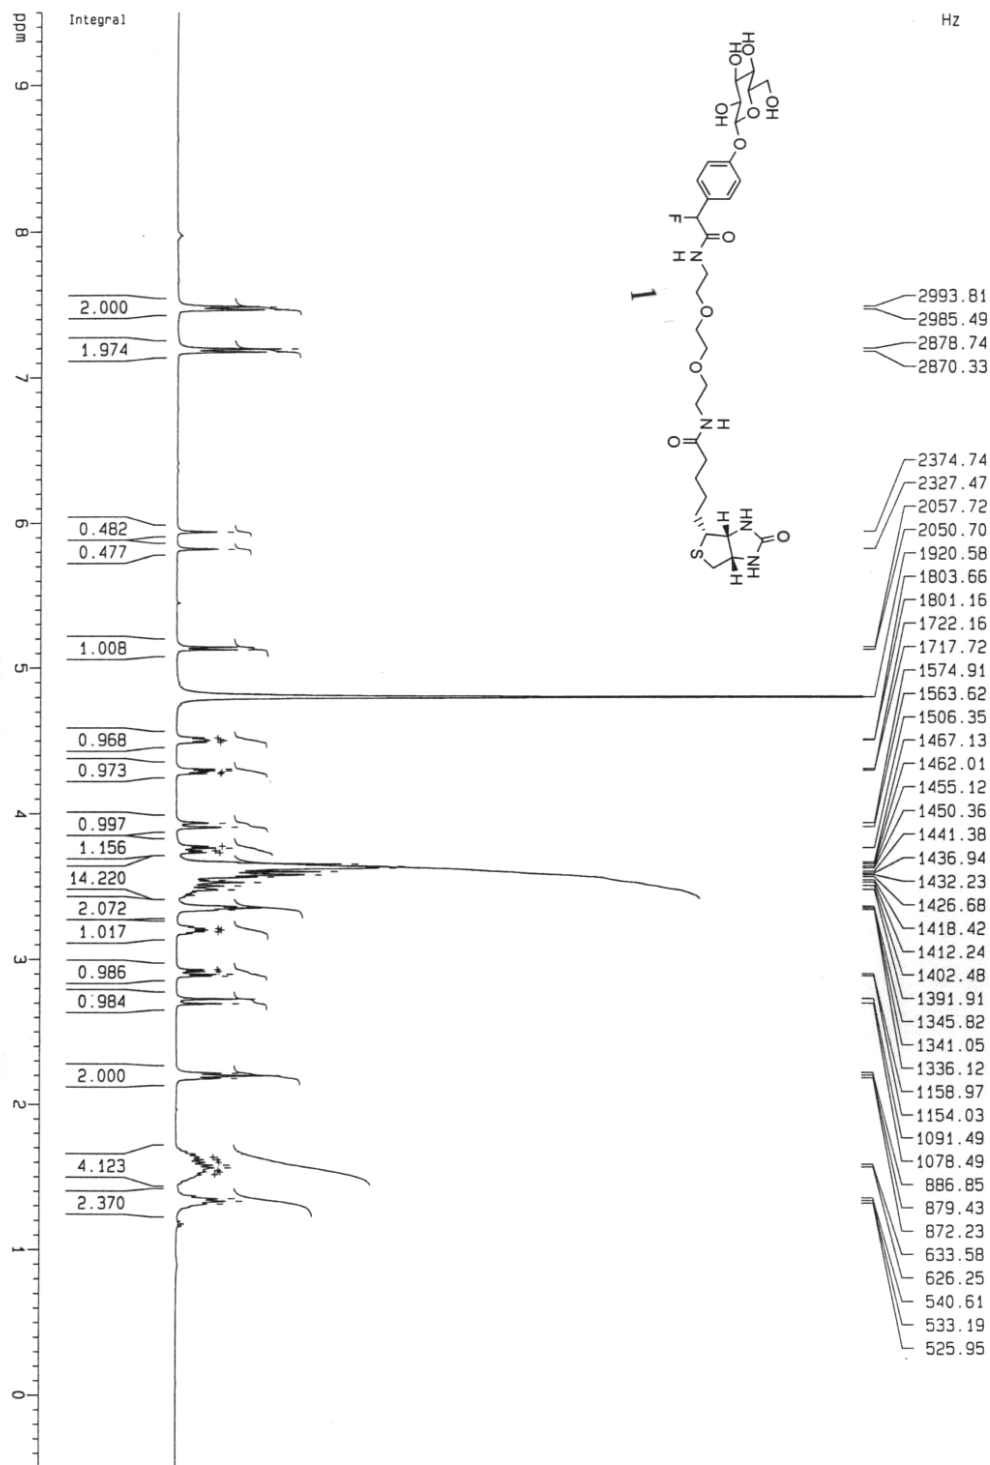

Current Data Parameters  
 Name: Y\_060 CDC13 020118 400MHz H1  
 Date: 11/11/18  
 Time: 13:43  
 Instrument: spect  
 Probe: 5 mm QNP 1H  
 P1: 12.00  
 FIDRES: 0.218735  
 AQ: 2.2601024  
 RG: 65.500  
 DE: 6.00  
 TE: 300.2  
 D1: 1.00000000  
 ===== CHANNEL f1 =====  
 NUC1: 13C  
 P1: 11.50  
 PL1: 0.00  
 SFO1: 400.1260099  
 F2 - Processing parameters  
 SI: 400.1259533  
 SF: 400.1259533  
 DS: 4  
 SSB: 0  
 LB: 0.00  
 GB: 0  
 PC: 1.00  
 ===== 1D NMR 2D1 parameters =====  
 CX: 20.00  
 F1: 0.0000000  
 F2: 3001.23  
 F3: -0.000  
 F4: -200.06  
 F5: 0.0000000  
 HZ: 160.65199



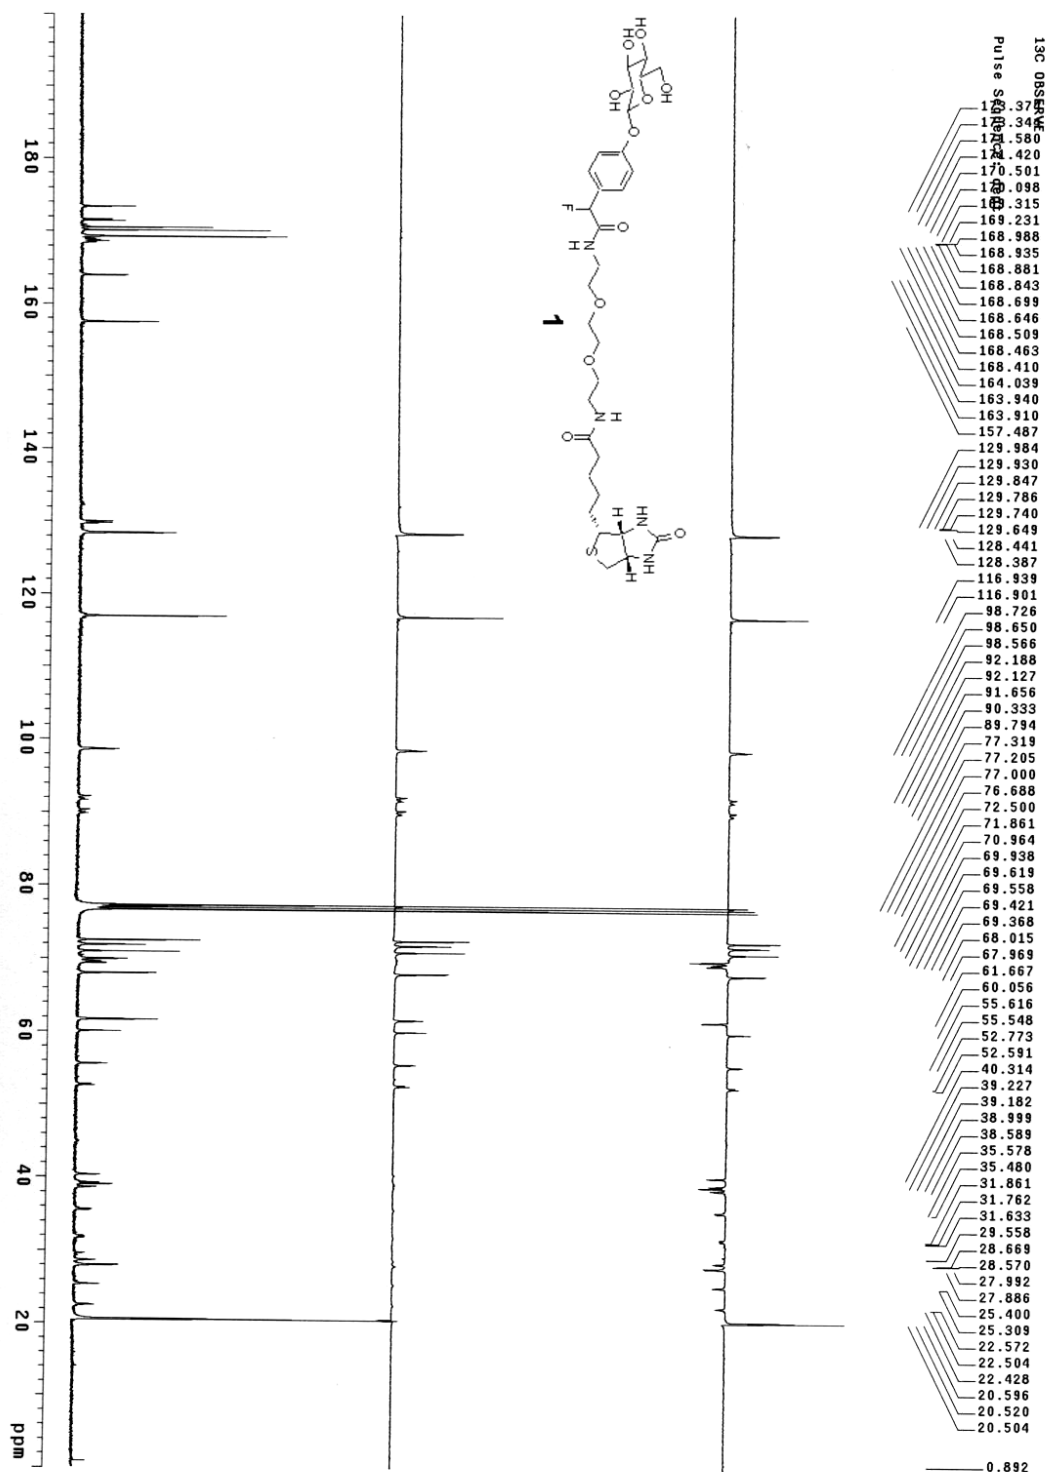

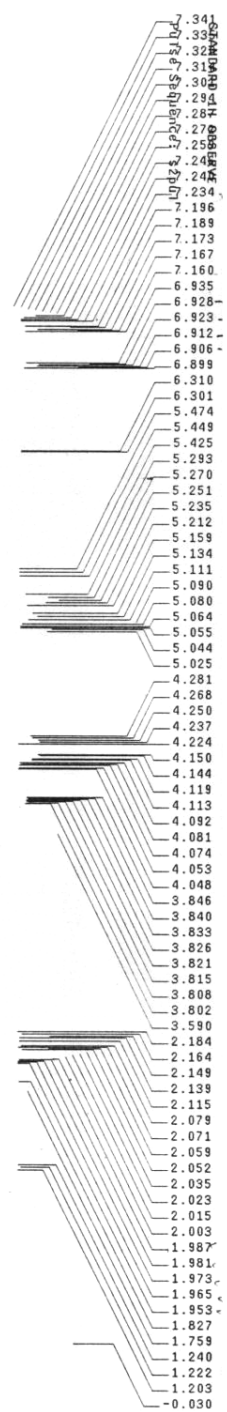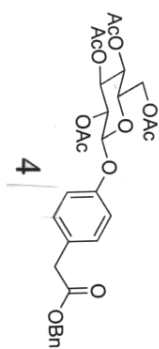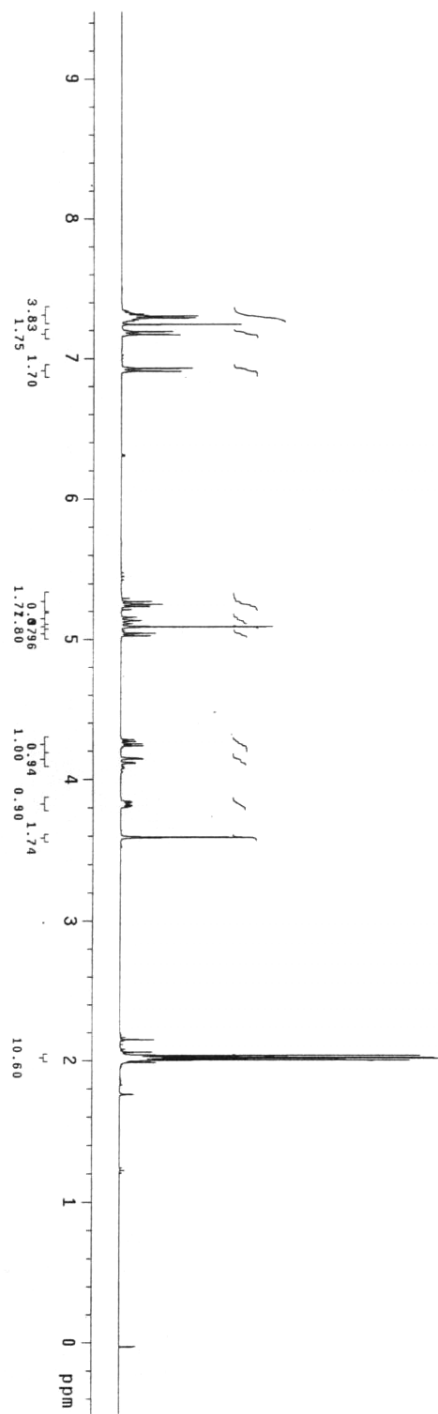

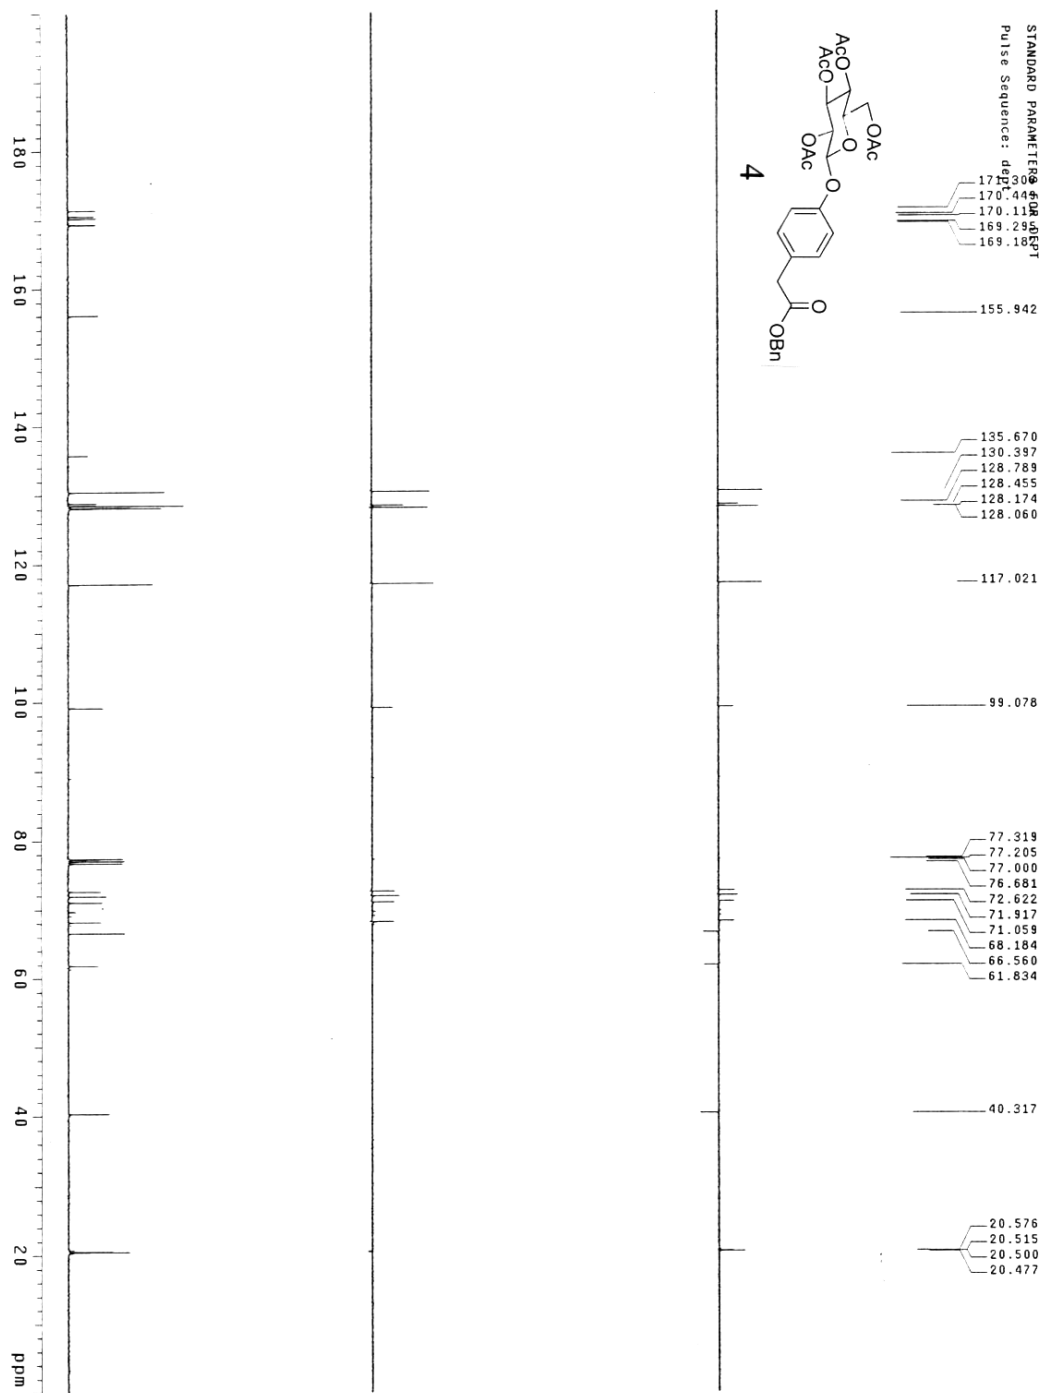

Y:038 CDCl3 011105 400MHz H1

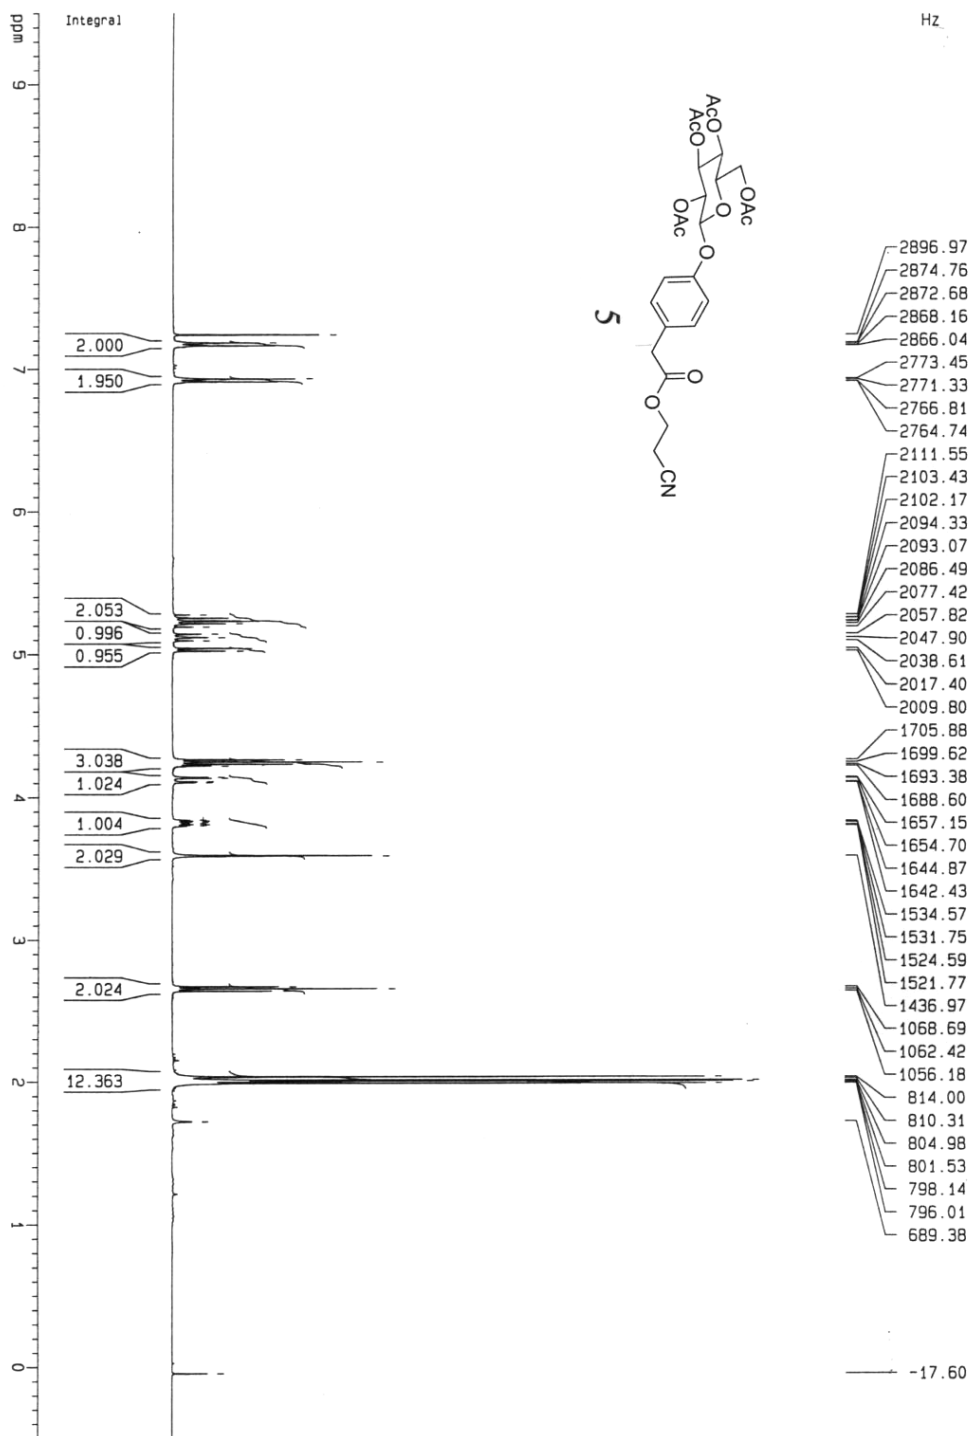

Current Data Parameters  
NAME Y:03801105  
EXPNO 100  
PROCNO 1  
F2 - Acquisition Parameters  
Date\_ 20011105  
Time 13.45  
INSTRUM spect  
PROBHD 5 mm QNP 1H  
NUC1 13C  
PULPROG zgpg30  
SOLVENT Acetone  
NS 16  
DS 4  
SWH 7183.508  
FIDRES 0.218235  
AQ 2.2807028  
RG 68.600  
DE 6.00  
TE 300.0  
D1 1.00000000  
\*\*\*\*\* CHANNEL f1 \*\*\*\*\*  
NUC1 13C  
P1 11.50  
PL1 0.00  
SFO1 400.1326059  
F2 - Processing parameters  
SI 32768  
SF 400.1300169  
WDW EM  
SSB 0  
LB 0.00  
GB 0  
PC 1.00  
1D NMR Data Parameters  
CPDPR 2.000  
F1 8.84500  
F2 3801.24  
F3 -30.000  
PCPD 0.40000  
PCNCH 180.25000  
H2CH

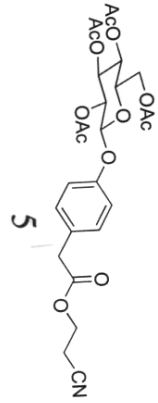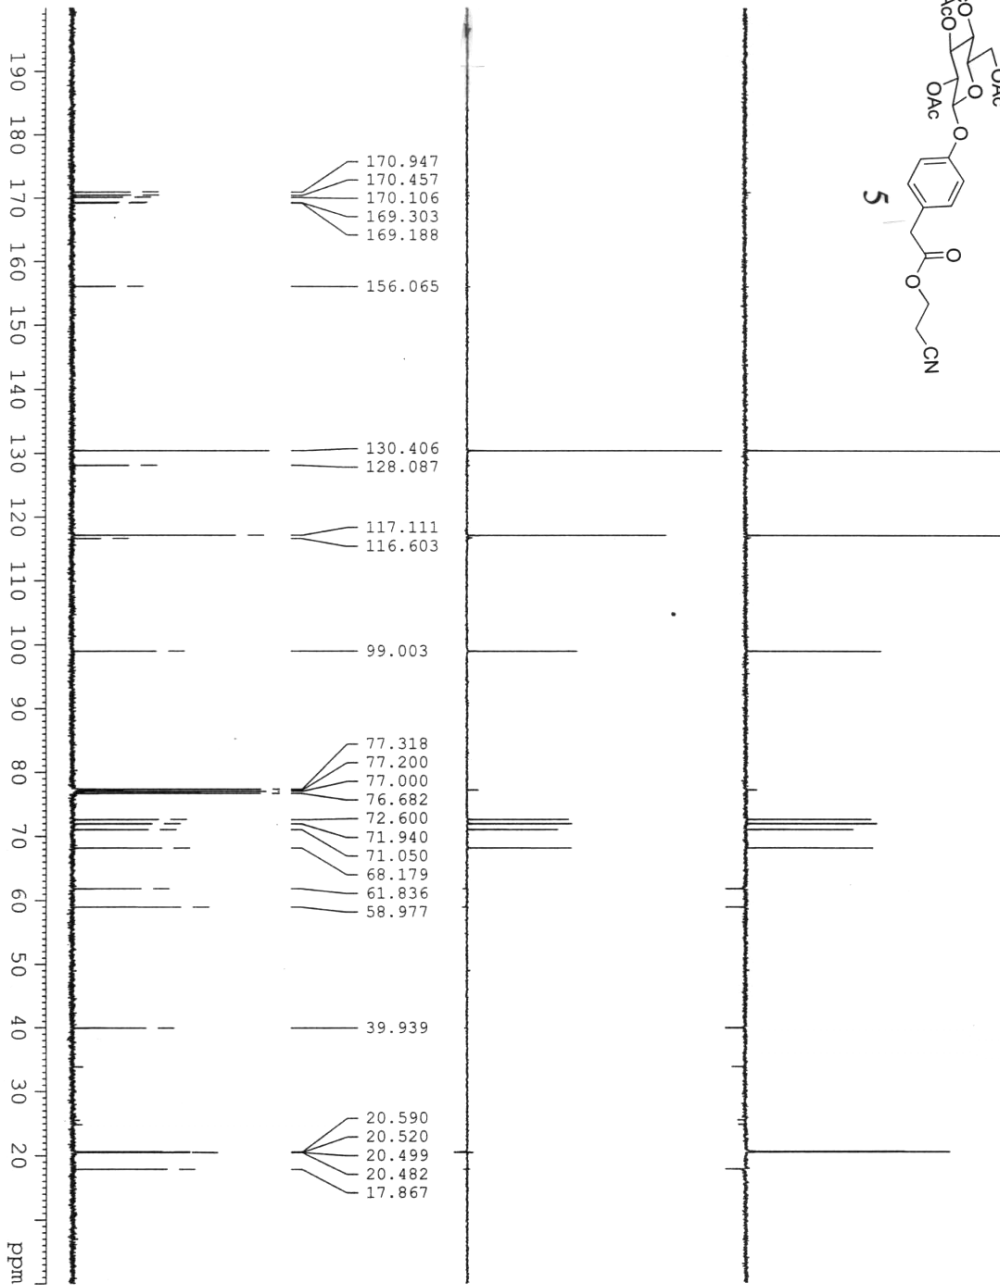

Current Data Parameters  
 NAME 171381105  
 EXPRNO 400  
 PROCNO 1  
 F2 - Acquisition Parameters  
 Date\_ 2011105  
 Time 12:45:10  
 INSTRUM spect  
 PROBHD 5 mm QNP 1H  
 PULPROG zgpg30  
 TD 65536  
 FIDRES 0.5845  
 AQ 1.5845  
 SOLVENT CDCl3  
 NS 122  
 DS 4  
 SWH 26178.010 Hz  
 FIDRES 0.399445 Hz  
 AQ 1.237768 sec  
 RG 32768  
 DW 19.100 usec  
 DE 1.00 usec  
 TE 300.2 K  
 D1 2.00000000 sec  
 d11 0.03000000 sec  
 d12 0.00000000 sec  
 ===== CHANNEL f1 =====  
 NUC1 13C  
 P1 9.50 usec  
 PL1 -3.00 dB  
 SFO1 100.6264025 MHz  
 ===== CHANNEL f2 =====  
 NUC2 1H  
 P2 18.00 usec  
 PL2 0.00 dB  
 PCPDZ 88.00 usec  
 P12 129.00 dB  
 P13 22.00 dB  
 SFO2 400.1318006 MHz  
 F2 - Processing parameters  
 SI 32768  
 SF 100.6127781 MHz  
 DSF 4096  
 LB 1.00 Hz  
 GB 0  
 PC 0.80

Y: 039 CDC13 011105 400MHz H1

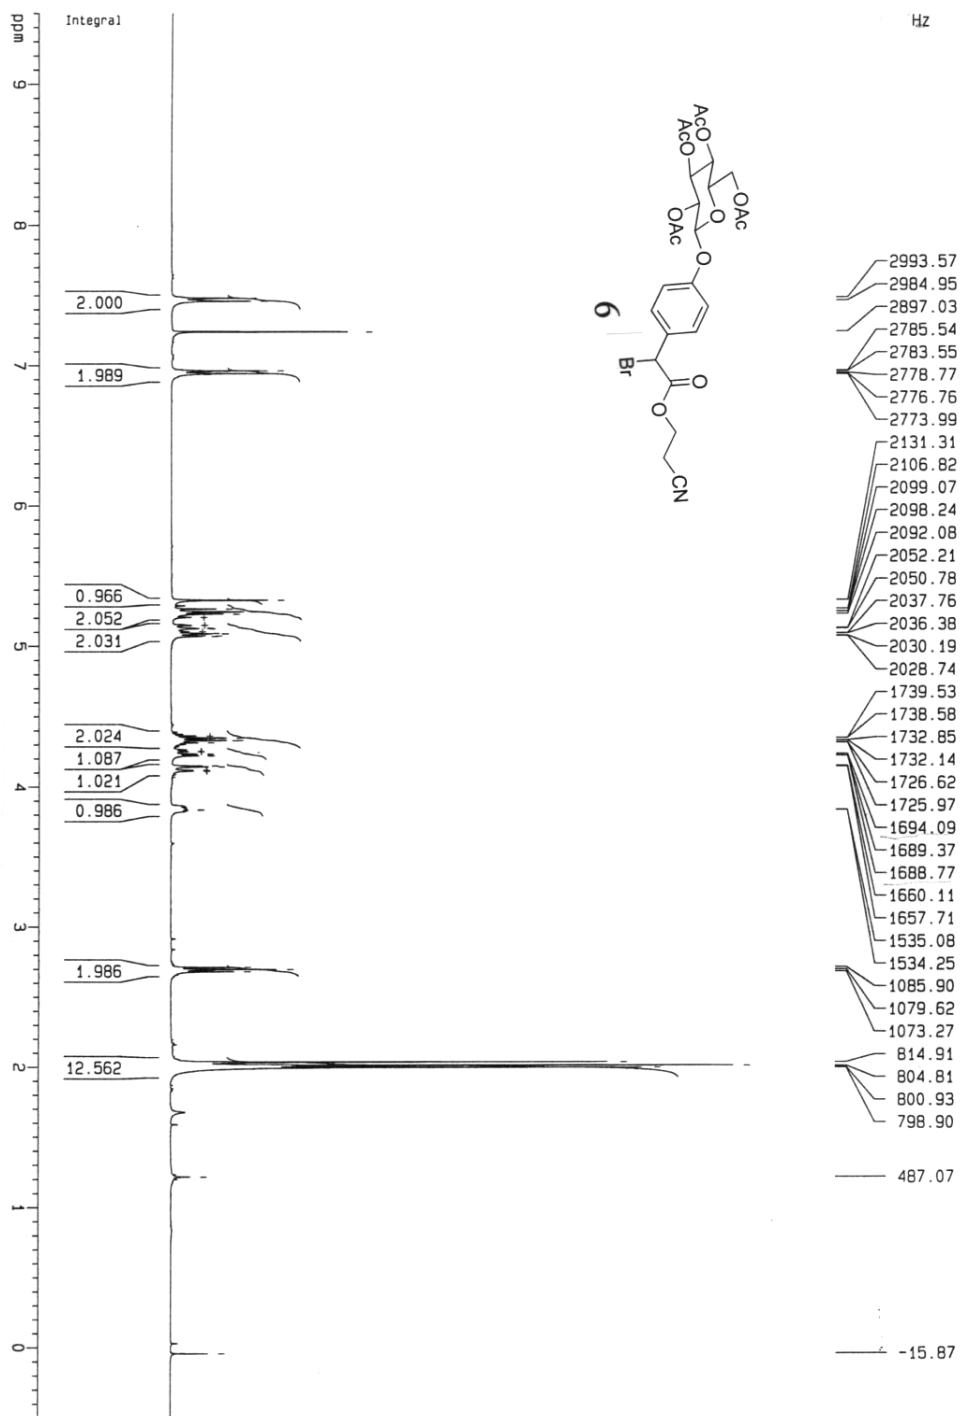

Current Data Parameters  
NAME Y: 03911105  
EXPNO 1  
PROCNO 1  
F2 - Acquisition Parameters  
Date\_ 03011105  
Time 14:14  
INSTRUM spect  
PROBHD 5 mm QNP 13C  
PULPROG zgpg30  
TD 32768  
SOLVENT acetone  
NS 0  
DS 0  
SWHES 7181.968  
AQ 0.1713324  
RG 327.68  
WDW EM  
SS 64  
LB 3.00  
GB 0  
PC 300.0  
TE 300.2  
FID 1.00000000  
\*\*\*\*\* CHANNEL f1 \*\*\*\*\*  
NUC1 1H  
P1 11.50  
PL1 0.00  
SFO1 400.1300000  
F2 - Processing parameters  
SI 32768  
SF 400.1300171  
WDW EM  
SS 64  
LB 3.00  
GB 0  
PC 1.00  
F1 25.00  
F2 301.14  
F3 0.500  
F4 0.500  
F5 0.500  
F6 0.500  
F7 0.500  
F8 0.500  
F9 0.500  
F10 0.500  
F11 0.500  
F12 0.500  
F13 0.500  
F14 0.500  
F15 0.500  
F16 0.500  
F17 0.500  
F18 0.500  
F19 0.500  
F20 0.500  
F21 0.500  
F22 0.500  
F23 0.500  
F24 0.500  
F25 0.500  
F26 0.500  
F27 0.500  
F28 0.500  
F29 0.500  
F30 0.500  
F31 0.500  
F32 0.500  
F33 0.500  
F34 0.500  
F35 0.500  
F36 0.500  
F37 0.500  
F38 0.500  
F39 0.500  
F40 0.500  
F41 0.500  
F42 0.500  
F43 0.500  
F44 0.500  
F45 0.500  
F46 0.500  
F47 0.500  
F48 0.500  
F49 0.500  
F50 0.500  
F51 0.500  
F52 0.500  
F53 0.500  
F54 0.500  
F55 0.500  
F56 0.500  
F57 0.500  
F58 0.500  
F59 0.500  
F60 0.500  
F61 0.500  
F62 0.500  
F63 0.500  
F64 0.500  
F65 0.500  
F66 0.500  
F67 0.500  
F68 0.500  
F69 0.500  
F70 0.500  
F71 0.500  
F72 0.500  
F73 0.500  
F74 0.500  
F75 0.500  
F76 0.500  
F77 0.500  
F78 0.500  
F79 0.500  
F80 0.500  
F81 0.500  
F82 0.500  
F83 0.500  
F84 0.500  
F85 0.500  
F86 0.500  
F87 0.500  
F88 0.500  
F89 0.500  
F90 0.500  
F91 0.500  
F92 0.500  
F93 0.500  
F94 0.500  
F95 0.500  
F96 0.500  
F97 0.500  
F98 0.500  
F99 0.500  
F100 0.500  
F101 0.500  
F102 0.500  
F103 0.500  
F104 0.500  
F105 0.500  
F106 0.500  
F107 0.500  
F108 0.500  
F109 0.500  
F110 0.500  
F111 0.500  
F112 0.500  
F113 0.500  
F114 0.500  
F115 0.500  
F116 0.500  
F117 0.500  
F118 0.500  
F119 0.500  
F120 0.500  
F121 0.500  
F122 0.500  
F123 0.500  
F124 0.500  
F125 0.500  
F126 0.500  
F127 0.500  
F128 0.500  
F129 0.500  
F130 0.500  
F131 0.500  
F132 0.500  
F133 0.500  
F134 0.500  
F135 0.500  
F136 0.500  
F137 0.500  
F138 0.500  
F139 0.500  
F140 0.500  
F141 0.500  
F142 0.500  
F143 0.500  
F144 0.500  
F145 0.500  
F146 0.500  
F147 0.500  
F148 0.500  
F149 0.500  
F150 0.500  
F151 0.500  
F152 0.500  
F153 0.500  
F154 0.500  
F155 0.500  
F156 0.500  
F157 0.500  
F158 0.500  
F159 0.500  
F160 0.500  
F161 0.500  
F162 0.500  
F163 0.500  
F164 0.500  
F165 0.500  
F166 0.500  
F167 0.500  
F168 0.500  
F169 0.500  
F170 0.500  
F171 0.500  
F172 0.500  
F173 0.500  
F174 0.500  
F175 0.500  
F176 0.500  
F177 0.500  
F178 0.500  
F179 0.500  
F180 0.500  
F181 0.500  
F182 0.500  
F183 0.500  
F184 0.500  
F185 0.500  
F186 0.500  
F187 0.500  
F188 0.500  
F189 0.500  
F190 0.500  
F191 0.500  
F192 0.500  
F193 0.500  
F194 0.500  
F195 0.500  
F196 0.500  
F197 0.500  
F198 0.500  
F199 0.500  
F200 0.500  
F201 0.500  
F202 0.500  
F203 0.500  
F204 0.500  
F205 0.500  
F206 0.500  
F207 0.500  
F208 0.500  
F209 0.500  
F210 0.500  
F211 0.500  
F212 0.500  
F213 0.500  
F214 0.500  
F215 0.500  
F216 0.500  
F217 0.500  
F218 0.500  
F219 0.500  
F220 0.500  
F221 0.500  
F222 0.500  
F223 0.500  
F224 0.500  
F225 0.500  
F226 0.500  
F227 0.500  
F228 0.500  
F229 0.500  
F230 0.500  
F231 0.500  
F232 0.500  
F233 0.500  
F234 0.500  
F235 0.500  
F236 0.500  
F237 0.500  
F238 0.500  
F239 0.500  
F240 0.500  
F241 0.500  
F242 0.500  
F243 0.500  
F244 0.500  
F245 0.500  
F246 0.500  
F247 0.500  
F248 0.500  
F249 0.500  
F250 0.500  
F251 0.500  
F252 0.500  
F253 0.500  
F254 0.500  
F255 0.500  
F256 0.500  
F257 0.500  
F258 0.500  
F259 0.500  
F260 0.500  
F261 0.500  
F262 0.500  
F263 0.500  
F264 0.500  
F265 0.500  
F266 0.500  
F267 0.500  
F268 0.500  
F269 0.500  
F270 0.500  
F271 0.500  
F272 0.500  
F273 0.500  
F274 0.500  
F275 0.500  
F276 0.500  
F277 0.500  
F278 0.500  
F279 0.500  
F280 0.500  
F281 0.500  
F282 0.500  
F283 0.500  
F284 0.500  
F285 0.500  
F286 0.500  
F287 0.500  
F288 0.500  
F289 0.500  
F290 0.500  
F291 0.500  
F292 0.500  
F293 0.500  
F294 0.500  
F295 0.500  
F296 0.500  
F297 0.500  
F298 0.500  
F299 0.500  
F300 0.500  
F301 0.500  
F302 0.500  
F303 0.500  
F304 0.500  
F305 0.500  
F306 0.500  
F307 0.500  
F308 0.500  
F309 0.500  
F310 0.500  
F311 0.500  
F312 0.500  
F313 0.500  
F314 0.500  
F315 0.500  
F316 0.500  
F317 0.500  
F318 0.500  
F319 0.500  
F320 0.500  
F321 0.500  
F322 0.500  
F323 0.500  
F324 0.500  
F325 0.500  
F326 0.500  
F327 0.500  
F328 0.500  
F329 0.500  
F330 0.500  
F331 0.500  
F332 0.500  
F333 0.500  
F334 0.500  
F335 0.500  
F336 0.500  
F337 0.500  
F338 0.500  
F339 0.500  
F340 0.500  
F341 0.500  
F342 0.500  
F343 0.500  
F344 0.500  
F345 0.500  
F346 0.500  
F347 0.500  
F348 0.500  
F349 0.500  
F350 0.500  
F351 0.500  
F352 0.500  
F353 0.500  
F354 0.500  
F355 0.500  
F356 0.500  
F357 0.500  
F358 0.500  
F359 0.500  
F360 0.500  
F361 0.500  
F362 0.500  
F363 0.500  
F364 0.500  
F365 0.500  
F366 0.500  
F367 0.500  
F368 0.500  
F369 0.500  
F370 0.500  
F371 0.500  
F372 0.500  
F373 0.500  
F374 0.500  
F375 0.500  
F376 0.500  
F377 0.500  
F378 0.500  
F379 0.500  
F380 0.500  
F381 0.500  
F382 0.500  
F383 0.500  
F384 0.500  
F385 0.500  
F386 0.500  
F387 0.500  
F388 0.500  
F389 0.500  
F390 0.500  
F391 0.500  
F392 0.500  
F393 0.500  
F394 0.500  
F395 0.500  
F396 0.500  
F397 0.500  
F398 0.500  
F399 0.500  
F400 0.500  
F401 0.500  
F402 0.500  
F403 0.500  
F404 0.500  
F405 0.500  
F406 0.500  
F407 0.500  
F408 0.500  
F409 0.500  
F410 0.500  
F411 0.500  
F412 0.500  
F413 0.500  
F414 0.500  
F415 0.500  
F416 0.500  
F417 0.500  
F418 0.500  
F419 0.500  
F420 0.500  
F421 0.500  
F422 0.500  
F423 0.500  
F424 0.500  
F425 0.500  
F426 0.500  
F427 0.500  
F428 0.500  
F429 0.500  
F430 0.500  
F431 0.500  
F432 0.500  
F433 0.500  
F434 0.500  
F435 0.500  
F436 0.500  
F437 0.500  
F438 0.500  
F439 0.500  
F440 0.500  
F441 0.500  
F442 0.500  
F443 0.500  
F444 0.500  
F445 0.500  
F446 0.500  
F447 0.500  
F448 0.500  
F449 0.500  
F450 0.500  
F451 0.500  
F452 0.500  
F453 0.500  
F454 0.500  
F455 0.500  
F456 0.500  
F457 0.500  
F458 0.500  
F459 0.500  
F460 0.500  
F461 0.500  
F462 0.500  
F463 0.500  
F464 0.500  
F465 0.500  
F466 0.500  
F467 0.500  
F468 0.500  
F469 0.500  
F470 0.500  
F471 0.500  
F472 0.500  
F473 0.500  
F474 0.500  
F475 0.500  
F476 0.500  
F477 0.500  
F478 0.500  
F479 0.500  
F480 0.500  
F481 0.500  
F482 0.500  
F483 0.500  
F484 0.500  
F485 0.500  
F486 0.500  
F487 0.500  
F488 0.500  
F489 0.500  
F490 0.500  
F491 0.500  
F492 0.500  
F493 0.500  
F494 0.500  
F495 0.500  
F496 0.500  
F497 0.500  
F498 0.500  
F499 0.500  
F500 0.500  
F501 0.500  
F502 0.500  
F503 0.500  
F504 0.500  
F505 0.500  
F506 0.500  
F507 0.500  
F508 0.500  
F509 0.500  
F510 0.500  
F511 0.500  
F512 0.500  
F513 0.500  
F514 0.500  
F515 0.500  
F516 0.500  
F517 0.500  
F518 0.500  
F519 0.500  
F520 0.500  
F521 0.500  
F522 0.500  
F523 0.500  
F524 0.500  
F525 0.500  
F526 0.500  
F527 0.500  
F528 0.500  
F529 0.500  
F530 0.500  
F531 0.500  
F532 0.500  
F533 0.500  
F534 0.500  
F535 0.500  
F536 0.500  
F537 0.500  
F538 0.500  
F539 0.500  
F540 0.500  
F541 0.500  
F542 0.500  
F543 0.500  
F544 0.500  
F545 0.500  
F546 0.500  
F547 0.500  
F548 0.500  
F549 0.500  
F550 0.500  
F551 0.500  
F552 0.500  
F553 0.500  
F554 0.500  
F555 0.500  
F556 0.500  
F557 0.500  
F558 0.500  
F559 0.500  
F560 0.500  
F561 0.500  
F562 0.500  
F563 0.500  
F564 0.500  
F565 0.500  
F566 0.500  
F567 0.500  
F568 0.500  
F569 0.500  
F570 0.500  
F571 0.500  
F572 0.500  
F573 0.500  
F574 0.500  
F575 0.500  
F576 0.500  
F577 0.500  
F578 0.500  
F579 0.500  
F580 0.500  
F581 0.500  
F582 0.500  
F583 0.500  
F584 0.500  
F585 0.500  
F586 0.500  
F587 0.500  
F588 0.500  
F589 0.500  
F590 0.500  
F591 0.500  
F592 0.500  
F593 0.500  
F594 0.500  
F595 0.500  
F596 0.500  
F597 0.500  
F598 0.500  
F599 0.500  
F600 0.500  
F601 0.500  
F602 0.500  
F603 0.500  
F604 0.500  
F605 0.500  
F606 0.500  
F607 0.500  
F608 0.500  
F609 0.500  
F610 0.500  
F611 0.500  
F612 0.500  
F613 0.500  
F614 0.500  
F615 0.500  
F616 0.500  
F617 0.500  
F618 0.500  
F619 0.500  
F620 0.500  
F621 0.500  
F622 0.500  
F623 0.500  
F624 0.500  
F625 0.500  
F626 0.500  
F627 0.500  
F628 0.500  
F629 0.500  
F630 0.500  
F631 0.500  
F632 0.500  
F633 0.500  
F634 0.500  
F635 0.500  
F636 0.500  
F637 0.500  
F638 0.500  
F639 0.500  
F640 0.500  
F641 0.500  
F642 0.500  
F643 0.500  
F644 0.500  
F645 0.500  
F646 0.500  
F647 0.500  
F648 0.500  
F649 0.500  
F650 0.500  
F651 0.500  
F652 0.500  
F653 0.500  
F654 0.500  
F655 0.500  
F656 0.500  
F657 0.500  
F658 0.500  
F659 0.500  
F660 0.500  
F661 0.500  
F662 0.500  
F663 0.500  
F664 0.500  
F665 0.500  
F666 0.500  
F667 0.500  
F668 0.500  
F669 0.500  
F670 0.500  
F671 0.500  
F672 0.500  
F673 0.500  
F674 0.500  
F675 0.500  
F676 0.500  
F677 0.500  
F678 0.500  
F679 0.500  
F680 0.500  
F681 0.500  
F682 0.500  
F683 0.500  
F684 0.500  
F685 0.500  
F686 0.500  
F687 0.500  
F688 0.500  
F689 0.500  
F690 0.500  
F691 0.500  
F692 0.500  
F693 0.500  
F694 0.500  
F695 0.500  
F696 0.500  
F697 0.500  
F698 0.500  
F699 0.500  
F700 0.500  
F701 0.500  
F702 0.500  
F703 0.500  
F704 0.500  
F705 0.500  
F706 0.500  
F707 0.500  
F708 0.500  
F709 0.500  
F710 0.500  
F711 0.500  
F712 0.500  
F713 0.500  
F714 0.500  
F715 0.500  
F716 0.500  
F717 0.500  
F718 0.500  
F719 0.500  
F720 0.500  
F721 0.500  
F722 0.500  
F723 0.500  
F724 0.500  
F725 0.500  
F726 0.500  
F727 0.500  
F728 0.500  
F729 0.500  
F730 0.500  
F731 0.500  
F732 0.500  
F733 0.500  
F734 0.500  
F735 0.500  
F736 0.500  
F737 0.500  
F738 0.500  
F739 0.500  
F740 0.500  
F741 0.500  
F742 0.500  
F743 0.500  
F744 0.500  
F745 0.500  
F746 0.500  
F747 0.500  
F748 0.500  
F749 0.500  
F750 0.500  
F751 0.500  
F752 0.500  
F753 0.500  
F754 0.500  
F755 0.500  
F756 0.500  
F757 0.500  
F758 0.500  
F759 0.500  
F760 0.500  
F761 0.500  
F762 0.500  
F763 0.500  
F764 0.500  
F765 0.500  
F766 0.500  
F767 0.500  
F768 0.500  
F769 0.500  
F770 0.500  
F771 0.500  
F772 0.500  
F773 0.500  
F774 0.500  
F775 0.500  
F776 0.500  
F777 0.500  
F778 0.500  
F779 0.500  
F780 0.500  
F781 0.500  
F782 0.500  
F783 0.500  
F784 0.500  
F785 0.500  
F786 0.500  
F787 0.500  
F788 0.500  
F789 0.500  
F790 0.500  
F791 0.500  
F792 0.500  
F793 0.500  
F794 0.500  
F795 0.500  
F796 0.500  
F797 0.500  
F798 0.500  
F799 0.500  
F800 0.500  
F801 0.500  
F802 0.500  
F803 0.500  
F804 0.500  
F805 0.500  
F806 0.500  
F807 0.500  
F808 0.500  
F809 0.500  
F810 0.500  
F811 0.500  
F812 0.500  
F813 0.500  
F814 0.500  
F815 0.500  
F816 0.500  
F817 0.500  
F818 0.500  
F819 0.500  
F820 0.500  
F821 0.500  
F822 0.500  
F823 0.500  
F824 0.500  
F825 0.500  
F826 0.500  
F827 0.500  
F828 0.500  
F829 0.500  
F830 0.500  
F831 0.500  
F832 0.500  
F833 0.500  
F834 0.500  
F835 0.500  
F836 0.500  
F837 0.500  
F838 0.500  
F839 0.500  
F840 0.500  
F841 0.500  
F842 0.500  
F843 0.500  
F844 0.500  
F845 0.500  
F846 0.500  
F847 0.500  
F848 0.500  
F849 0.500  
F850 0.500  
F851 0.500  
F852 0.500  
F853 0.500  
F854 0.500  
F855 0.500  
F856 0.500  
F857 0.500  
F858 0.500  
F859 0.500  
F860 0.500  
F861 0.500  
F862 0.500  
F863 0.500  
F864 0.500  
F865 0.500  
F866 0.500  
F867 0.500  
F868 0.500  
F869 0.500  
F870 0.500  
F871 0.500  
F872 0.500  
F873 0.500  
F874 0.500  
F875 0.500  
F876 0.500  
F877 0.500  
F878 0.500  
F879 0.500  
F880 0.500  
F881 0.500  
F882 0.500  
F883 0.500  
F884 0.500  
F885 0.500  
F886 0.500  
F887 0.500  
F888 0.500  
F889 0.500  
F890 0.500  
F891 0.500  
F892 0.500  
F893 0.500  
F894 0.500  
F895 0.500  
F896 0.500  
F897 0.500  
F898 0.500  
F899 0.500  
F900 0.500  
F901 0.500  
F902 0.500  
F903 0.500  
F904 0.500  
F905 0.500  
F906 0.500  
F907 0.500  
F908 0.500  
F909 0.500  
F910 0.500  
F911 0.500  
F912 0.500  
F913 0.500  
F914 0.500  
F915 0.500  
F916 0.500  
F917 0.500  
F918 0.500  
F919 0.500  
F920 0.500  
F921 0.500  
F922 0.500  
F923 0.500  
F924 0.500  
F925 0.500  
F926 0.500  
F927 0.500  
F928 0.500  
F929 0.500  
F930 0.500  
F931 0.500  
F932 0.500  
F933 0.500  
F934 0.500  
F935 0.500  
F936 0.500  
F937 0.500  
F938 0.500  
F939 0.500  
F940 0.500  
F941 0.500  
F942 0.500  
F943 0.500  
F944 0.500  
F945 0.500  
F946 0.500  
F947 0.500  
F948 0.500  
F949 0.500  
F950 0.500  
F951 0.500  
F952 0.500  
F953 0.500  
F954 0.50

Y.039 CDCl3 011105 400MHz C13 ( 250p to -10p )

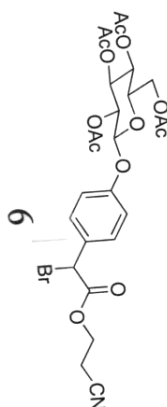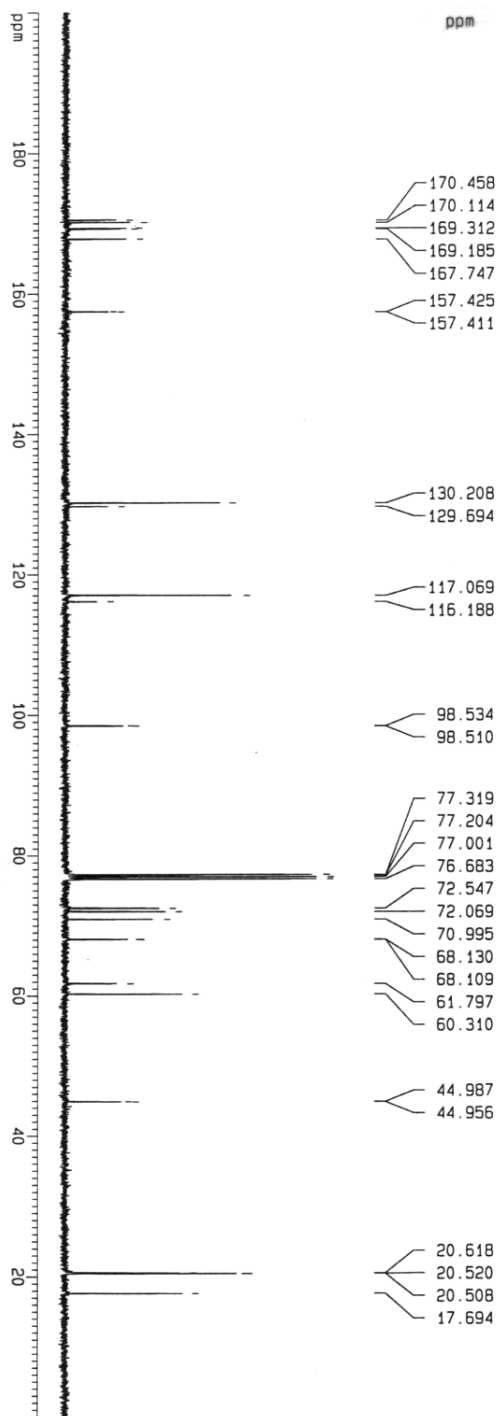

```

Current Data Parameters
NAME      Y.03911105
EXPNO     1
PROCNO    1
F2 - Acquisition Parameters
Date_     20011105
Time      14.17
INSTRUM   spect
PROBHD    5 mm QNP1H
PULPROG   zgpg30
TD         65536
SOLVENT   CDCl3
NS         278
DS         2
SWH        20178.415
F2 - F1      125.76444
F2 - F2      1.2517975
AQ          32.068
RG          327.5
DE          1.00
TE          300.0
SI          2
SF          101.625000
AQ          0.03000000
AQ          0.05000000
----- CHANNEL f1 -----
NUC1       13C
P1         9.50
PC         0.00
PR         0.00
SFO1       100.626055
----- CHANNEL f2 -----
NUC2       1H
P2         1.60
PC2        0.00
PR2        0.00
SFO2       400.146401
F2 - Processing parameters
SI          32768
SF          100.626055
WDW         EM
SSB         0
LB          1.00
GB          0
PC          0.80
PC2         0.00
TO         250.000
F1P         201.26225
F2P         201.26225
RG          6.00
RFXH        8.000000
RFXH        80.418022
  
```

Y:049 011226 CDCl3 400MHz H1

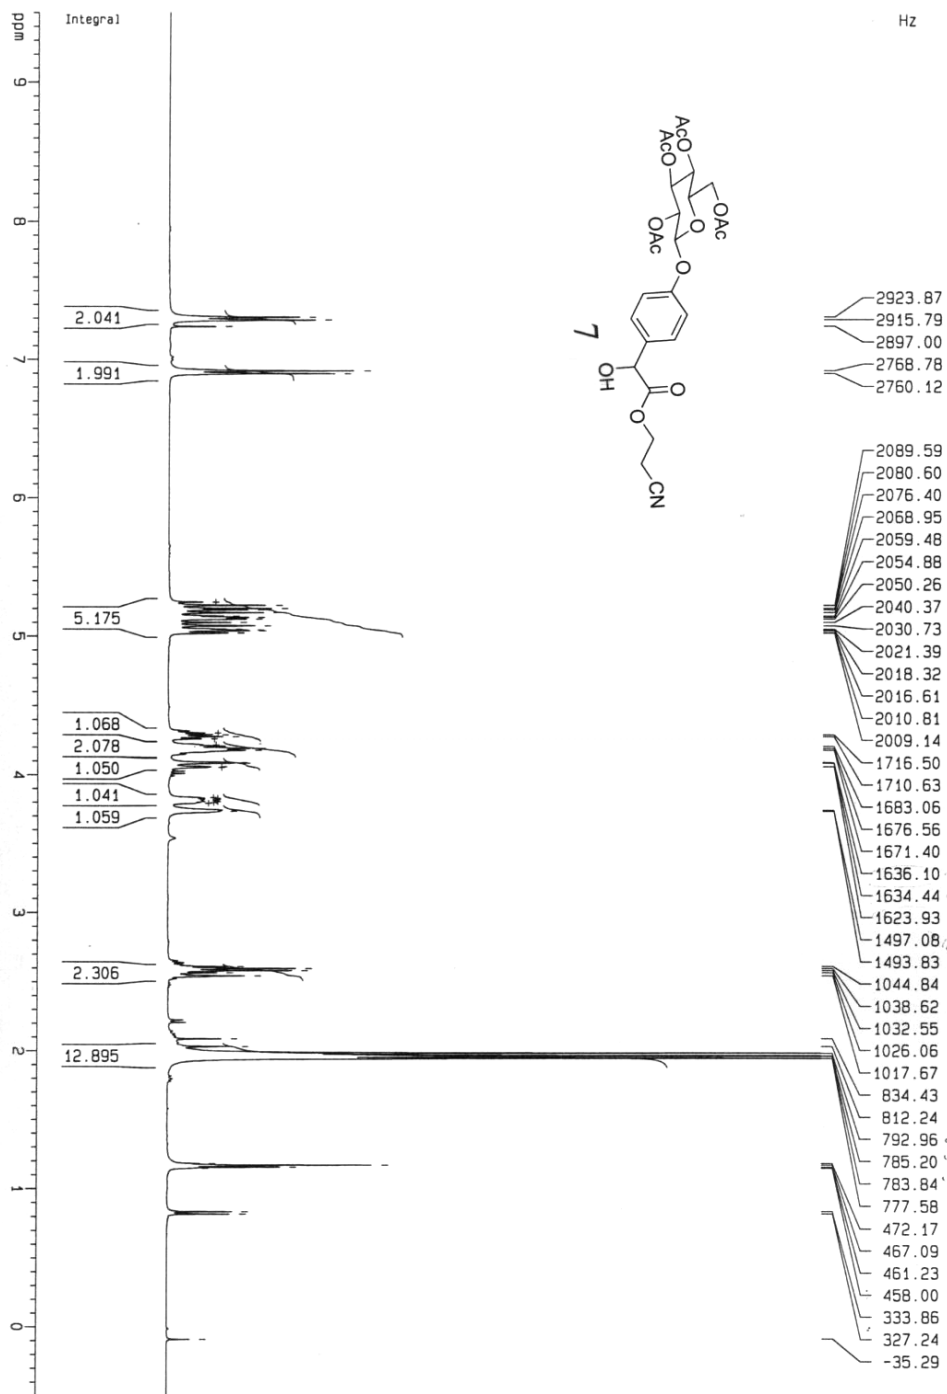

Current Data Parameters  
 Name: Y:049011226  
 ExpNO: 1  
 F2 - Acquisition Parameters  
 Date\_: 20011226  
 Time: 14.44  
 Instrument: spect  
 PROBHD: 5 mm QNP 1H  
 NUC1: 13C  
 NUC2: 13C  
 PULPROG: zgpg30  
 SOLVENT: Acetone  
 NS: 16  
 DS: 4  
 SWH: 7183.508  
 FIDRES: 0.218025  
 AQ: 0.000125  
 RG: 2.000000  
 ACQ: 2.000000  
 CW: 68.600  
 DE: 1.00  
 TE: 300.2  
 D1: 1.0000000  
 ===== CHANNEL f1 =====  
 NUC1: 13C  
 P1: 11.50  
 PL1: 0.00  
 SFO1: 400.130000  
 F2 - Processing parameters  
 SI: 32768  
 SF: 400.130000  
 WDM: 64  
 SD: 1.00  
 LR: 0.50  
 GB: 0  
 PC: 1.00  
 1D NMR Sift parameters  
 SI: 32768  
 SF: 400.130000  
 WDM: 64  
 SD: 1.00  
 LR: 0.50  
 GB: 0  
 PC: 1.00  
 F2P: 20.50  
 F1P: 102.500  
 F2R: 300.134  
 F1R: -0.500  
 F2P: -200.127  
 F1P: 0.000000  
 NUC1: 13C  
 NUC2: 13C



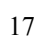

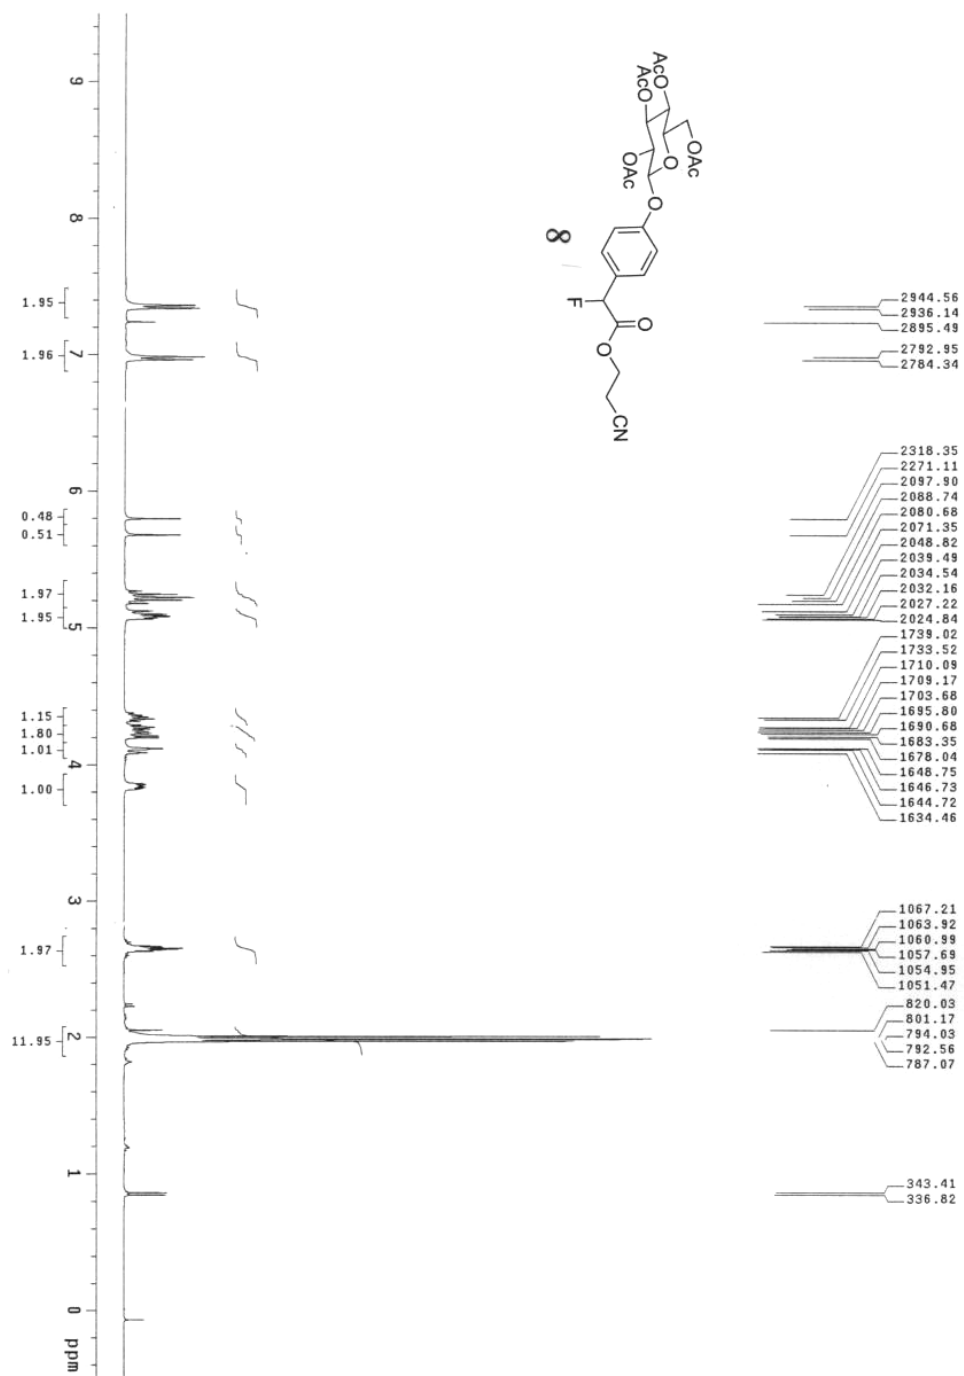

STANDARD PARAMETERS FOR  $^{13}\text{C}$  NMR  
Pulse Sequence: dept-135

| Chemical Shift (ppm) |
|----------------------|
| 170.322              |
| 169.976              |
| 169.222              |
| 169.099              |
| 167.968              |
| 167.672              |
| 157.756              |
| 157.733              |

| Chemical Shift (ppm) |
|----------------------|
| 128.364              |
| 128.303              |
| 128.273              |
| 128.242              |
| 128.212              |
| 128.159              |
| 117.067              |
| 116.141              |

| Chemical Shift (ppm) |
|----------------------|
| 98.494               |
| 98.464               |
| 89.336               |
| 89.276               |
| 87.485               |
| 87.424               |

| Chemical Shift (ppm) |
|----------------------|
| 77.319               |
| 77.000               |
| 76.681               |
| 72.433               |
| 71.962               |
| 70.915               |
| 68.047               |
| 61.727               |
| 59.649               |

| Chemical Shift (ppm) |
|----------------------|
| 22.351               |
| 20.492               |
| 20.416               |
| 20.401               |
| 17.677               |

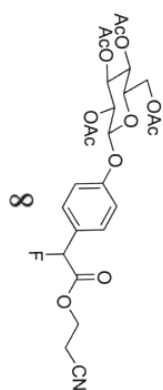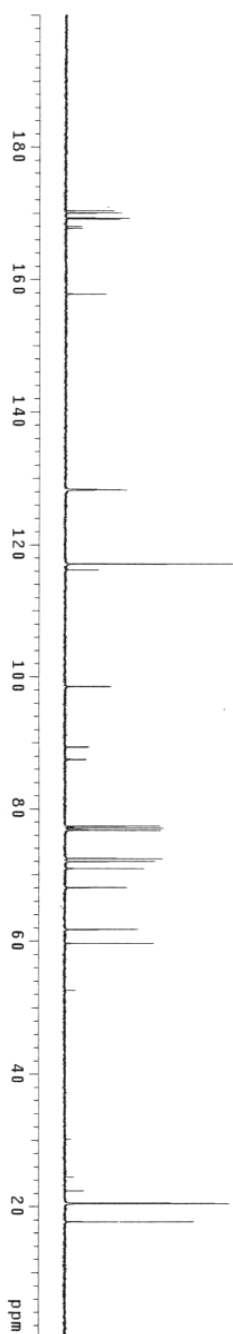

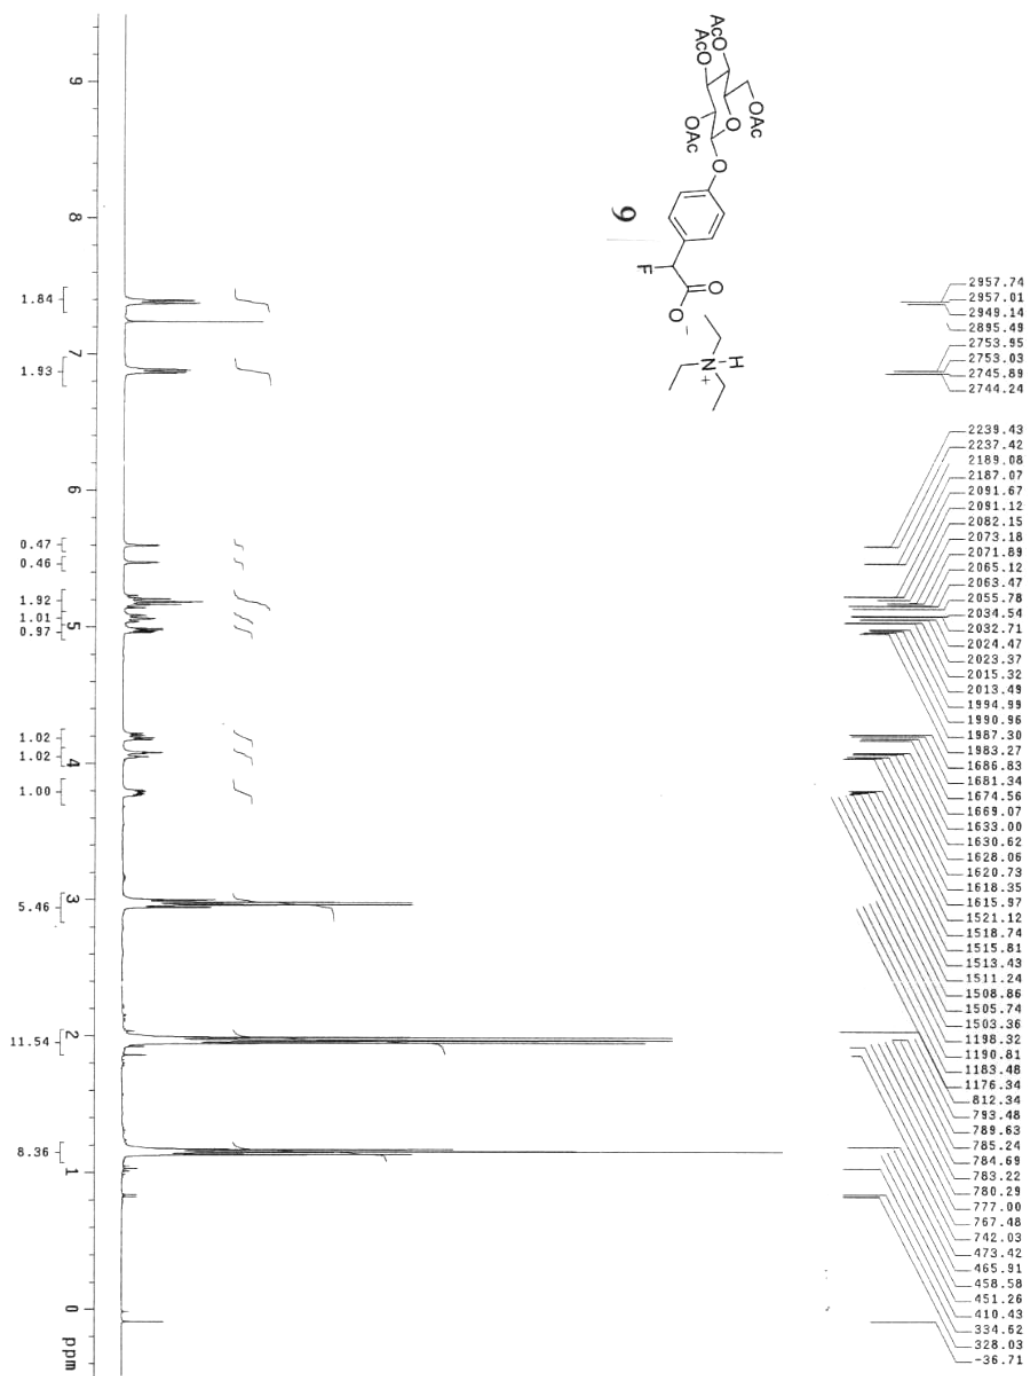

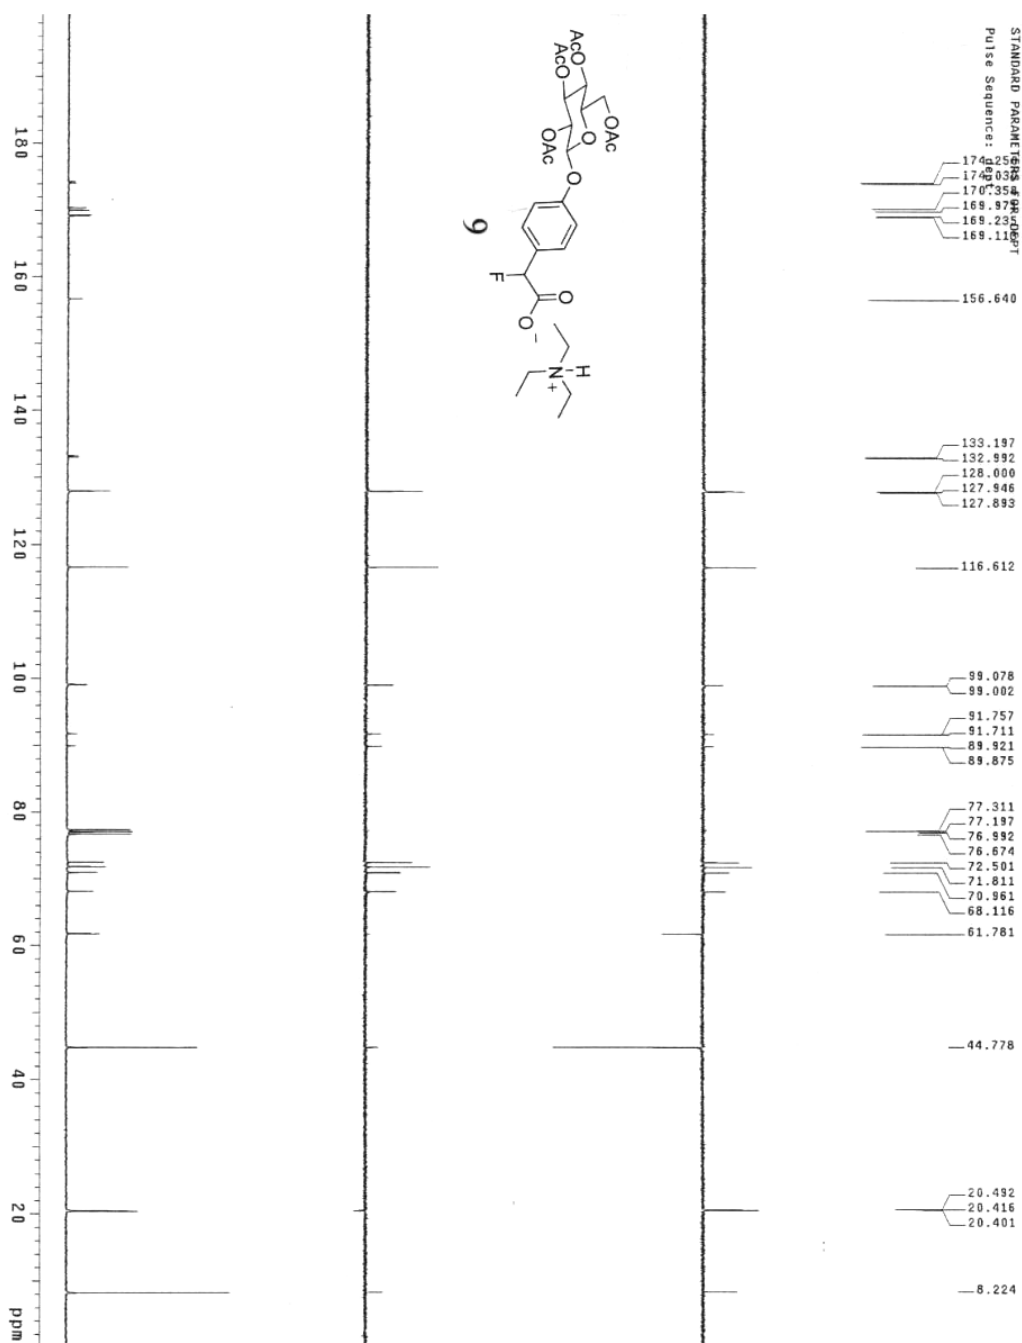

Y.056 CDCl3 020111 400MHz H1

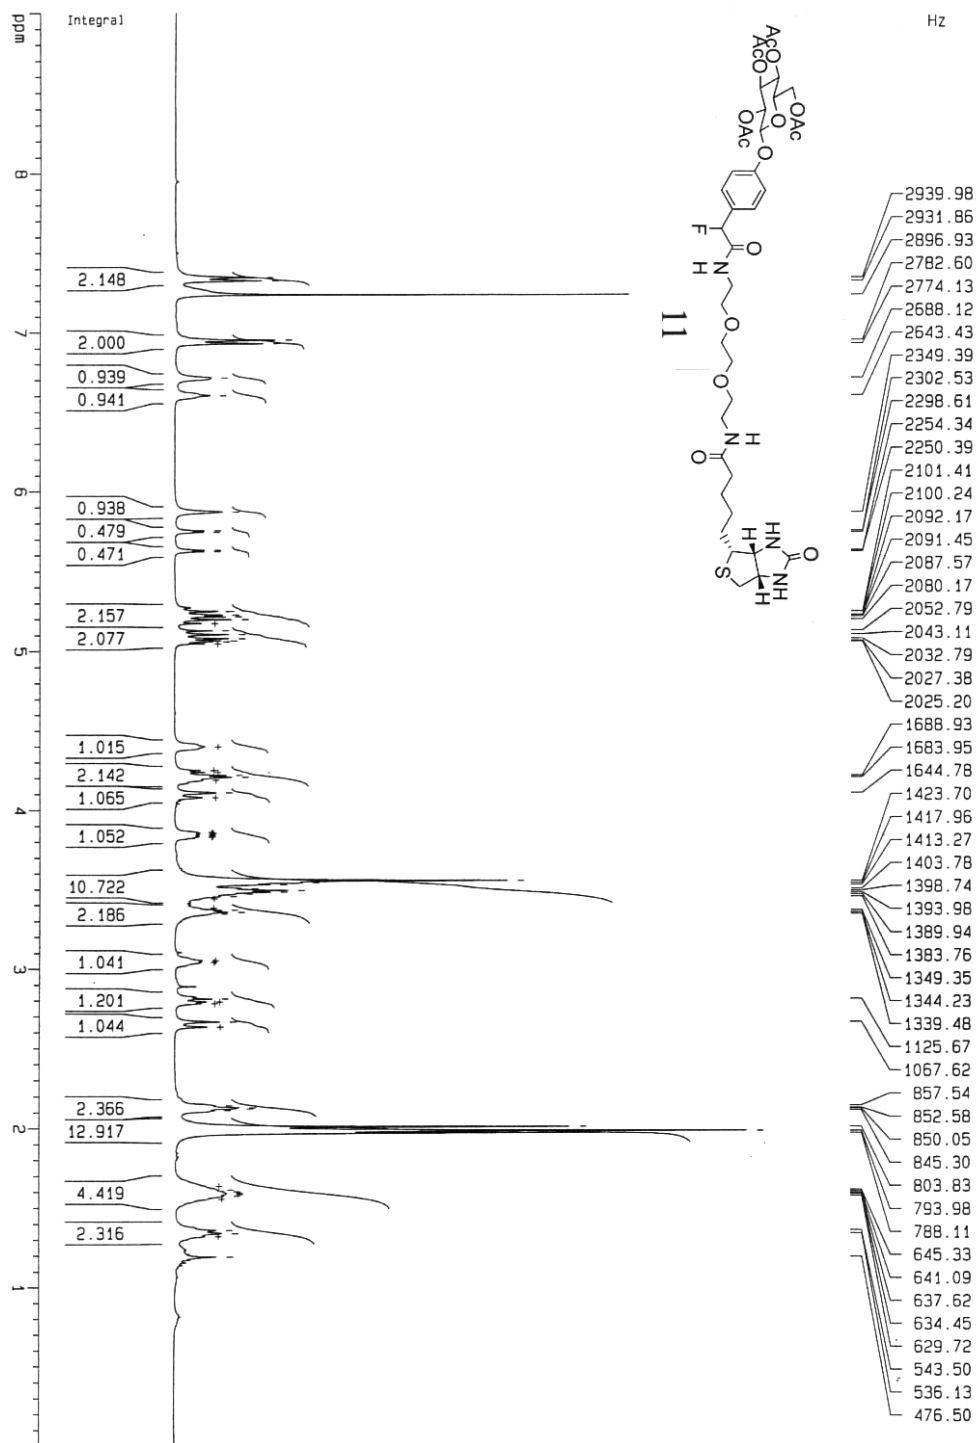

Current Data Parameters  
 Name: Y.056020111  
 ExpNO: 100  
 F2 - Acquisition Parameters  
 Date\_: 20020111  
 Time: 12.50  
 Instrument: spect  
 PROBHD: 5 mm QNP 1H  
 PULPROG: zgpg30  
 FIDRES: 0.2207028  
 SFO1: 400.1260951  
 AQ: 2.2807028  
 DE: 63.600  
 TE: 300.2  
 D1: 1.00000000  
 \*\*\*\*\* CHANNEL f1 \*\*\*\*\*  
 NUC1: 1H  
 P1: 11.50  
 PL1: 0.00  
 SFO1: 400.1260951  
 F2 - Processing parameters  
 SI: 32768  
 SF: 400.1305159  
 SC: 64  
 SS: 5280  
 LB: 0.00  
 GB: 0  
 PC: 1.00  
 10 MHz B1H parameters  
 EX: 25.00  
 FL: 1.00  
 F1: 3061.17  
 F2: 0.000  
 PR: 0.0000  
 NUCB: 144.04660

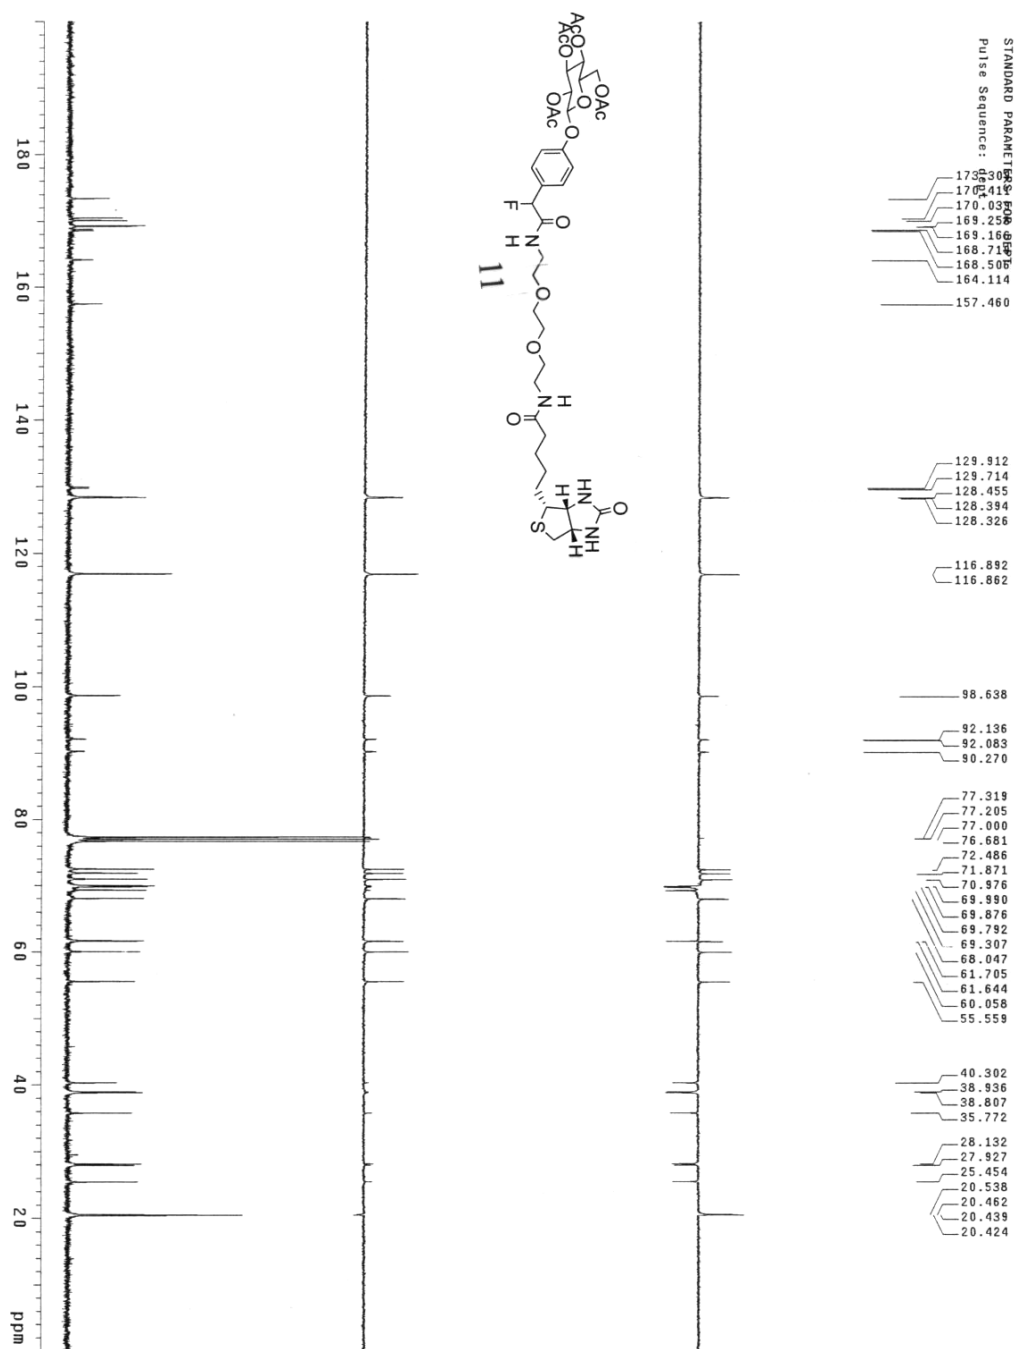

Supplement: Supplementary file 1 [file 5837187]
